1 **Microbiology and Infectious Disease / Evolutionary Biology**

2

3 **The genome of a persistent giant algal virus encodes an unprecedented number**

4 **of genes involved in energy metabolism**

5

6 Romain Blanc-Mathieu<sup>1,2</sup>, Håkon Dahle<sup>3</sup>, Antje Hofgaard<sup>4</sup>, David Brandt<sup>5</sup>, Jörn

7 Kalinowski<sup>5</sup>, Hiroyuki Ogata<sup>1</sup> and Ruth-Anne Sandaa<sup>6\*</sup>

8

9 1: Institute for Chemical Research, Kyoto University, Gokasho, Uji, 611-0011, Japan

10 2: Laboratoire de Physiologie Cellulaire & Végétale, CEA, Univ. Grenoble Alpes,

11 CNRS, INRA, IRIG, Grenoble, France

12 3: Department of Biological Sciences and K.G. Jebsen Center for Deep Sea Research,

13 University of Bergen, Bergen, Norway

14 4: Department of Biosciences, University of Oslo, Norway

15 5: Center for Biotechnology, Universität Bielefeld, Bielefeld, 33615, Germany

16 6: Department of Biological Sciences, University of Bergen, Bergen, Norway

17 \*Corresponding author: Ruth-Anne Sandaa, +47 55584646, [ruth.sandaa@uib.no](mailto:ruth.sandaa@uib.no)

18

## 19 **Abstract**

20 Viruses on Earth are tremendously diverse in terms of morphology, functionality, and  
21 genomic composition. Over the last decade, the conceptual gap separating viruses and  
22 cellular life has tightened because of the detection of metabolic genes in viral  
23 genomes that express complex virus phenotypes upon infection. Here, we describe the  
24 1.4 MB linear genome of *Prymnesium kappa* Virus RF01 (PκV RF01), a large alga-  
25 infecting virus of the *Mimiviridae* family with a unique morphology, an atypical  
26 infection profile, and an unprecedented number of genes involved in energy  
27 metabolism (such as the tricarboxylic acid cycle (TCA) cycle and the  $\beta$ -oxidation  
28 pathway). We show that the gene corresponding to one of these enzymes (the  
29 succinate dehydrogenase subunit A) is transcribed during infection and is widespread  
30 among marine viruses. This discovery provides evidence that a virus can actively  
31 regulate energy metabolism with its own gene.

32

33 **Key words:** Algal viruses, *Mimiviridae*, persistent, co-evolution, metabolism, energy  
34 production, succinate dehydrogenase,  $\beta$ -oxidation and aminoacyl-tRNA synthetases

## 35 **Introduction**

36 In their essay “Varieties of Living Things: Life at the Intersection of Lineage and  
37 Metabolism,” Dupré and O’Malley proposed to address Schrödinger’s question  
38 “What is Life?” by “*describing a spectrum of biological entities that illustrates why*  
39 *no sharp dividing line between living and non-living things is likely to be useful*”  
40 (Dupré, 2009). Microbiologists have contributed considerably to this descriptive  
41 effort, both by reporting the existence of viruses endowed with genes coding for  
42 functions once thought to be exclusive to cellular life and by concomitantly proposing  
43 that actively infecting viruses are a “living form” (Claverie, 2006; Forterre, 2012;  
44 Raoult and Forterre, 2008). Genes encoding elements for photosynthesis (Lindell et  
45 al., 2004; Mann et al., 2003), carbon metabolism (Hurwitz et al., 2013), and nitrogen-  
46 (Thompson et al., 2011) and sulfur-cycling (Anantharaman et al., 2014) have been  
47 found in bacterial viruses, where they are used to maintain or augment cellular  
48 processes during infection and to redirect energy and resources towards viral  
49 production (Fridman et al., 2017; Lindell et al., 2005; Thompson et al., 2011). Genes  
50 for protein synthesis, including translation initiation, elongation, and termination, and  
51 a range of aminoacyl-tRNA synthetases have been found in *Mimiviridae*, a group of  
52 giant viruses infecting single-celled eukaryotes (Abrahão et al., 2018; Raoult et al.,  
53 2004; Schulz et al., 2017). *Mimiviridae* and other large DNA viruses, including some  
54 bacterial viruses, also have tRNA genes (Miller et al., 2003; Yoshikawa et al., 2018).  
55 Ribosomal proteins have recently been reported in viral genomes derived from  
56 metagenomes (Mizuno et al., 2019). Genes involved in other metabolic processes,  
57 such as fermentation (Schvarcz and Steward, 2018), glycosylation (Piacente et al.,  
58 2015), photosynthesis (Schulz et al., 2020), and rhodopsin (Needham et al., 2019), are  
59 encoded in *Mimiviridae* and other related large eukaryotic DNA viruses. Metabolic

60 genes are frequently observed within virus genomes (Nishimura et al., 2017; Roux et  
61 al., 2016; Schulz et al., 2020); although they represent a tiny fraction of the viral gene  
62 pool, these genes have the potential to dramatically modify the phenotype of an  
63 actively infected cell and alter the ecological role of the host (Forterre, 2013; Hurwitz  
64 et al., 2013; Rosenwasser et al., 2016). The infected host in this state has been  
65 referred to as a virocell (Forterre, 2012). One might expect that the interplay between  
66 viral genes and host genes in virocells would become increasingly fine-tuned and  
67 complex during prolonged virus–host co-evolution, which also typically leads to  
68 lower virulence. However, much of the complexity of virocells may still be  
69 undetected, as most currently isolated algal viruses are highly virulent, with several  
70 involved in rapid algal bloom termination events (Coy et al., 2018).

71 Viruses of the *Mimiviridae* family are known to infect heterotrophic and  
72 autotrophic microbial eukaryotes. This divide is also reflected in the phylogeny of  
73 these viruses, some of which are classified into two proposed sub-families:  
74 “Megavirinae” and “Mesomimivirinae” (Gallot-Lavallée et al., 2017). The former  
75 contains viruses with genomes larger than 1 MB, all isolated from Amoebozoa, while  
76 the latter includes viruses with smaller genomes isolated from haptophyte algae of  
77 class Prymnesiophyceae. Several *Mimiviridae* members outside these two groups  
78 have been characterized to some extent as well, namely, viruses isolated from  
79 heterotrophs (*Cafeteria roenbergensis* virus, CroV; *Bodo saltans* virus, BsV; Choano  
80 virus), autotrophs (*Aureococcus anophagefferens* virus, AaV; *Tetraselmis* virus 1,  
81 TetV; *Pyramimonas orientalis* virus, PoV; *Prymnesium kappa* virus RF01, PkV  
82 RF01), a metazoan (Namao virus), and metagenomes (Klosneuviruses). The  
83 Mesomimivirinae sub-family includes viruses infecting bloom-forming haptophyte  
84 hosts, such as *Phaeocystis pouchetii*, *Phaeocystis globosa*, and *Prymnesium parvum*

85 (PpV, PgV Group I, and PpDVAV, respectively) (Baudoux and Brussaard, 2005;  
86 Jacobsen et al., 1996; Wagstaff et al., 2017); it also includes several viruses infecting  
87 *Haptolina ericina* and *Prymnesium kappa*, which normally do not form massive  
88 blooms but are present at low densities in seawater year round (Egge et al., 2015). In  
89 marine environments, viruses infecting low-density and non-bloom-forming algae  
90 may be the most common virus–host systems—that is, low-density hosts (non-  
91 blooming) and viruses that appear to have co-evolved in response to host growth  
92 strategy. Thus far, the only known representatives of such viruses are the haptophyte  
93 viruses *Prymnesium kappa* viruses RF01 (Pkv RF01) and RF02 (Pkv RF02),  
94 *Haptolina ericina* virus RF02 (HeV RF02), and *Chrysochromulina ericina* virus (CeV  
95 01B, infecting *Haptolina ericina*) (Johannessen et al., 2015; Sandaa et al., 2001).  
96 Together with PgV, all of these viruses, except for Pkv RF01, belong to the sub-  
97 family Mesomimivirinae on the basis of their monophyletic relationship and, in the  
98 case of PgV and CeV, a shared genomic similarity (Gallot-Lavallée et al., 2017). In  
99 contrast, phylogenetic analysis of two partially sequenced marker genes has placed  
100 Pkv RF01 deep inside the *Mimiviridae* clade, and characterization of its life cycle has  
101 revealed an atypical infection profile (Johannessen et al., 2015). Here, we report new  
102 viral functions inferred from analysis of the genome sequence of Pkv RF01. We  
103 found that this virus is less virulent than most other alga-infecting viruses and  
104 possesses an unprecedented number of energy-generating genes. We uncovered clues  
105 suggesting that members of *Mimiviridae* that potentially modulate the metabolism of  
106 their hosts are widespread in the ocean. Our findings of peculiar genomic features in a  
107 persistent virus provide new insights on virus–host coevolution and may stimulate  
108 further advances in modeling the history of their interaction.

## 109 **Results and Discussion**

### 110 **PkV RF01 has an atypical morphology**

111 The icosahedral PkV RF01 particle is approximately 400 nm in diameter (Figure 1).  
112 Beneath the capsid, several convoluted inner membranes fill approximately 66% of  
113 the interior. Chloroform treatment of PkV RF01 drastically reduced the infectivity of  
114 the virus, suggesting that lipid-containing molecules are involved in the infection  
115 process (Figure 1– figure supplement 1). As no outer membrane was detected by  
116 cryo-electron tomography, the chloroform treatment may have affected lipid  
117 components in either the capsid or the inner convoluted membranes. Internal lipid-  
118 containing membranes have been detected in several icosahedral-shaped double-  
119 stranded DNA viruses, including algal viruses belonging to families *Phycodnaviridae*  
120 and *Mimiviridae*, mimiviruses, and various bacteriophages (Huiskonen et al., 2004;  
121 Huiskonen and Butcher, 2007; King et al., 2011; Peralta et al., 2013; Philippe et al.,  
122 2018; Yan et al., 2005). In all of these viruses, the inner membranes are suggested to  
123 play a role in the release of the viral nucleoprotein core or genome by fusing with the  
124 host plasma membrane (Huiskonen and Butcher, 2007; Peralta et al., 2013; Philippe et  
125 al., 2018). Inner membranes in currently described NCLDV's more or less adopt the  
126 icosahedral morphology defined by the outer layer of capsomers (Klose and  
127 Rossmann, 2014; Yan et al., 2009). We detected several convoluted inner membranes  
128 in PkV RF01 that do not follow the structure of the capsid. To our knowledge, this  
129 structural inconsistency has not been previously detected in any double-stranded  
130 DNA viruses, which calls for further investigation to understand the assembly process  
131 of PkV RF01 and how it enters its host. Another striking feature of the PkV RF01  
132 virion is an internal rod-shaped core (ca. 55 nm in diameter), which is filled with  
133 dense material and positioned in the center of the virus particle. Similar features have

134 been observed in TEM images of large virus-like particles (VLPs) (300–700 nm)  
135 occurring in waste vacuoles of phaeodarian radiolarians collected from different  
136 oceans (Gowing, 1993) and in zoospores of the green alga *Chlorococcus minutum*  
137 (Gromov and Mamkaeva, 1981). To our knowledge, however, these features have not  
138 been described in isolated viruses thus far.

139 **Figure 1**

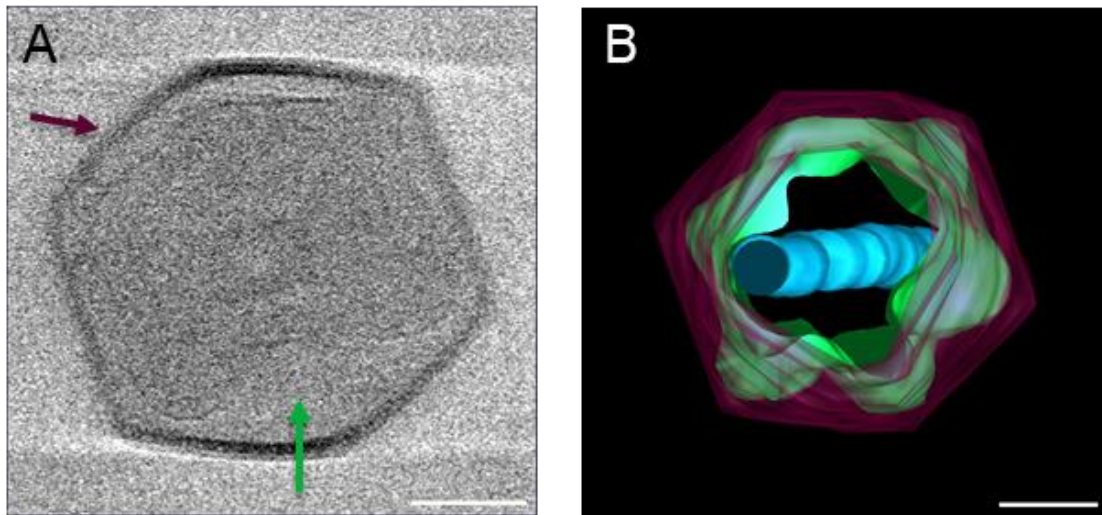

140

141 **PkV RF01 morphology.**

142 (A) Screen shot of a cryo-electron tomogram of a PkV RF01 virion. (B) Composite  
143 image of 61 cryo-electron tomograms (–60 to 60°, imaged every 2°). Purple, capsid;  
144 green, inner membrane consisting of multiple irregular, convoluted membranes; blue,  
145 internal rod-shaped core filled with dense material. The full set of records is available  
146 on GitHub (see [Data availability](#) section). Scale bar, 100 nm.

147 **PkV RF01 has an atypical infection strategy**

148 Compared to other cultured algal viruses, PkV RF01 has an atypical infection strategy  
149 characterized by a more persistent relationship with its hosts. Only 2% of the total  
150 PkV RF01 viral particles produced during infection of *Haptolina ericina* UiO028 (He  
151 UiO028) are infectious (able to produce progeny) ([Table 1](#)). This infectivity is much  
152 lower than that of the other two prymnesioviruses, HeV RF02 and PkV RF02, which  
153 produced infectious progeny of 13% and 44%, respectively ([Table 1](#)). The portion of  
154 infectious particles of PkV RF01 is low also when compared to other algal viruses

155 (Bratbak et al., 1998; Zimmerman et al., 2019). Further, the latent period of PkV  
 156 RF01 is longer (ca. 24–32 h, (Johannessen et al., 2015)) in comparison with other  
 157 prymnesioviruses (Baudoux and Brussaard, 2005; Jacobsen et al., 1996; Johannessen  
 158 et al., 2015; Sandaa et al., 2001) and PkV RF01 is able to infect multi-species that is  
 159 also an unusual trait among algal viruses (Coy et al., 2018).

160

161 **Table 1. Infection parameters of *Prymnesium kappa* viruses RF01 and RF02**  
 162 **and *Haptolina ericina* virus RF02.** VLP, virus-like particle; MPN, most probable  
 163 number; FCM, flow cytometry.

| Viral species and hosts | Infectious progeny/mL (MPN)    | Host cells/mL (FCM) <sup>a</sup> | Total VLP/mL (FCM)             | Burst size (VLP) <sup>b</sup> | Infectivity (%) <sup>c</sup> | Infectious particles in a burst <sup>d</sup> |
|-------------------------|--------------------------------|----------------------------------|--------------------------------|-------------------------------|------------------------------|----------------------------------------------|
| PkV RF01 (He UiO028)    | 2.9x10 <sup>6</sup><br>(± 0.2) | 4.9x10 <sup>5</sup>              | 1.8x10 <sup>8</sup><br>(±0.9)  | 363                           | 2                            | 6                                            |
| PkV RF02 (Pk RCC3423)   | 2.2x10 <sup>8</sup><br>(± 0.2) | 4.6x10 <sup>5</sup>              | 5.0x10 <sup>8</sup><br>(±0.1)  | 1093                          | 44                           | 483                                          |
| HeV RF02 (He UiO028)    | 5.8x10 <sup>7</sup><br>(±0.2)  | 4.9 x 10 <sup>5</sup>            | 4.4 x10 <sup>8</sup><br>(±0.0) | 907                           | 13                           | 119                                          |

164

<sup>a</sup>Measurement performed in duplicates

165

<sup>b</sup>The number of viral particles released from each host cell, estimated from the total number of host cells pre-infection and the total number of VLPs produced during the infection cycle.

166

<sup>c</sup>Estimated as the percentage of infectious progeny of all VLPs produced during the infection cycle.

167

168

<sup>d</sup>Number of infectious particles released per host cell.

169

170 Differences in viral infectious strategies results from the co-evolution between  
 171 viruses and their hosts. The hosts of PkV RF01, PkV RF02, and HeV RF02 all belong  
 172 to order Prymnesiales, whose members are normally present in low abundance but co-  
 173 occur year round (*K*-strategists) (Thomsen et al., 1994). All these viruses have lower  
 174 infectivity and longer latent periods compared with viruses infecting bloom-forming  
 175 haptophytes (*r*-strategists). Long replication time and lower infectivity, as hosts  
 176 becomes scarce, increases the chances of vertical transmission rather than horizontal  
 177 transmission of the virus. Vertical parent-to-offspring transmission depends on host  
 178 reproduction and should therefore evolve towards lower virulence to increase the  
 179 virus fitness (Berngruber et al., 2013; Day and Proulx, 2004). High virulence, on the  
 180 other hand, may be supported by large, dense host populations because high host



181 densities ensure successful horizontal transmission of viral progeny to new hosts  
182 (Berngruber et al., 2013; King et al., 2009). The highly acute viruses infecting  
183 recurrent bloom-forming haptophytes, e.g. *Emiliana huxleyi* virus (EhV),  
184 *Phaeocystis pouchetii* virus (PpV), and *Phaeocystis globosa* virus (PgV), normally  
185 have short latent periods, which results in rapid lysis of the host (Baudoux and  
186 Brussaard, 2005; Castberg et al., 2002; Wagstaff et al., 2017). The infectivity of PgV  
187 and PpV is also high, between 60%–100% (Bratbak et al., 1998; Brussaard et al.,  
188 2007).

189 Broad host range is another characteristic that might increase the chance of  
190 transmission in an environment with low host abundances. Generalist strategy is  
191 associated with trade-offs in the form of “paying” a higher infectivity cost and  
192 decreasing the opportunity of transmission with longer replication times, higher decay  
193 rates and decreased infectivity (discussed in (Leggett et al., 2013; Woolhouse et al.,  
194 2001)). This fits well with the two multi-species infecting haptophyte viruses,  
195 PkV RF01 and HeV RF02, that have reduced proportions of infectious particles and  
196 longer replication times (33), relative to other haptophyte viruses with restricted host  
197 ranges. In the ocean, persistent relationships—such as between PkV RF01 and its  
198 hosts—seem to be most common among viruses infecting unicellular algae; this has  
199 been demonstrated by several metabarcoding studies revealing the persistence of  
200 dominance of viral OTUs over several months (Gran-Stadniczeňko et al., 2019;  
201 Johannessen et al., 2017).

## 202 **PkV RF01 has the largest genome among algal viruses**

203 The genome of PkV RF01 was assembled as a linear DNA sequence of 1,4 MB. This  
204 size is more than twice that of the genome of TetV, which means that PkV RF01 has  
205 the largest reported genome of any virus infecting a photosynthetic organism (Figure

206 [2A](#)). Evidence for the linear structure of this genome is the presence of ~5-KB  
207 terminal inverted repeats. Despite being phylogenetically more closely related to alga-  
208 infecting *Mimiviridae*, the genome size of PkV RF01 is in the range of heterotroph-  
209 infecting *Mimiviridae*. The overall G+C content of PkV RF01 is 22.8%, which is low  
210 compared with other *Mimiviridae* (23%–41%). The genome of PkV RF01 is predicted  
211 to contain 1,161 genes comprising 1,121 protein-coding DNA sequences (CDSs) and  
212 40 tRNA genes corresponding to 13 amino acids ([Appendix 1 – Table S1](#)).

213 OrthoFinder identified 19 groups of paralogs, all containing two genes, except for one  
214 with six genes. This low number of identified paralogs indicates that gene duplication  
215 has not played an important role in the evolution of the genome size of this virus, at  
216 least not recently (rapid divergence may create distant paralogs that are difficult to  
217 identify).

218         Of the 1,121 predicted CDSs, 567 (51%) exhibited sequence similarities  
219 (BLASTP *E*-value conservative cutoff of  $1 \times 10^{-5}$ ) to protein sequences in the RefSeq  
220 database ([Figure 2A](#)). Among them, 204 (36%) were most similar to eukaryotes,  
221 while 164 (29%) were closest to bacteria and 190 (34%) to NCLDVs. Among the  
222 CDSs most similar to NCLDVs, 138 (73%) corresponded to Mesomimivirinae and 38  
223 (28%) to Megavirinae, with CeV and PgV being the most represented taxa ([Figure](#)  
224 [2B](#)). Among the closest homologs found in eukaryotic organisms, 24 were  
225 haptophytes (12 in *Emiliana huxleyi* and 12 in *Chrysochromulina* sp.). A sequence-  
226 based homology search of corrected nanopore reads and scaffolds composing the  
227 initial assembly against *Lavidaviridae* proteomes (BLASTX; matrix: BLOSUM45, *E*-  
228 value  $< 1 \times 10^{-5}$ ) yielded no significant alignments against any major or minor  
229 *Lavidaviridae* capsid proteins, which suggests that virophages were absent from the  
230 sample used for sequencing.

231 **Figure 2.**

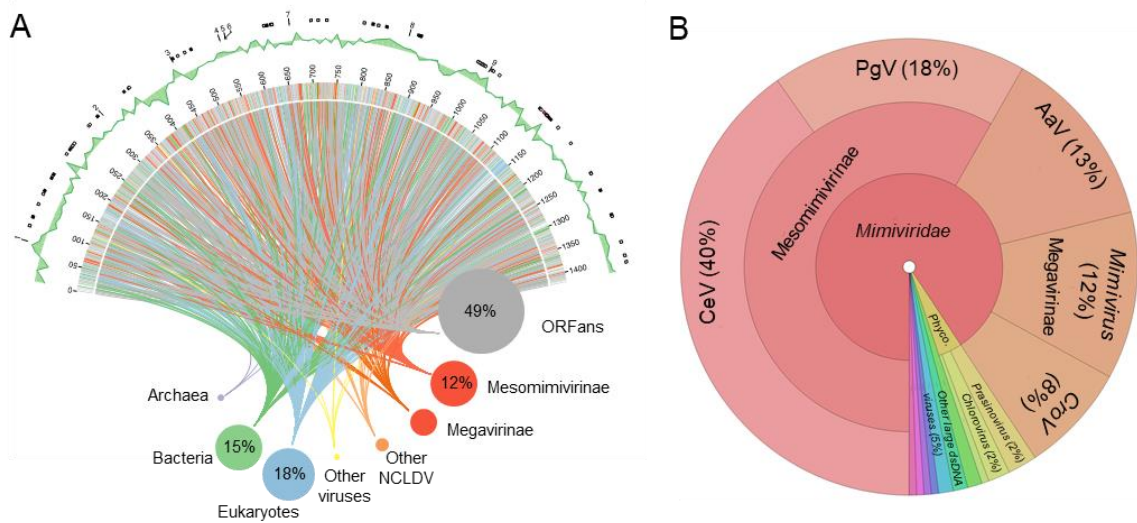

232

233 **Structure and gene taxonomic composition of the PkV RF01 genome**

234 **sequence.** (A) Rhizome and genomic features of the PkV RF01 genome. As  
235 illustrated by the rhizome (inner part of the figure), ORFans comprise the largest set  
236 of PkV RF01 genes, while a substantial portion (12%) have their best BLAST hits  
237 (RefSeq) against “Mesomimivirinae.” Colors indicate taxonomic origin. Intergenic  
238 regions are white. Percentage hits per taxonomic group higher than 5% of total  
239 genes are indicated. In the outermost ring, rectangles indicate the positions of  
240 glycosyltransferases (white), lipid-related enzymes (black), and succinate  
241 dehydrogenase genes (red), and the numbers correspond to *Mimiviridae* key  
242 enzymes (1 and 3: DNA-directed RNA polymerase II subunits 1 and 2, respectively;  
243 2: DNA mismatch repair protein MutS7; 4: Packaging ATPase; 5: VLTF3, 6: Major  
244 capsid protein; 7: Eukaryotic translation initiation factor 4E; 8: Asparagine synthase;  
245 9: DNA polymerase family B). The ring adjacent to the outermost ring shows GC  
246 skew over a 10-KB window. (B) Taxonomic breakdown of 194 genes with best hits to  
247 virus genes. Taxa represented by fewer than 2% of the genes are Pacmanvirus,  
248 *Caudovirales*, *Poxviridae*, *Baculoviridae*, *Marseilleviridae*, Pithovirus, and  
249 Kaumoebavirus.

250

251 A previous analysis of PkV RF01 family-B DNA polymerase (PolB) and the  
252 major capsid protein (MCP) placed this virus in family *Mimiviridae* (Johannessen et  
253 al., 2015). We also recently reported that the PkV RF01 genome has additional  
254 NCLDV core genes and orthologous genes that are specific to *Mimiviridae*, namely,  
255 MutS7 and asparagine synthase (Sandaa et al., n.d.). Phylogenetic reconstruction

256 using five NCLDV core genes confirmed the deep branching of PkV RF01 within the  
 257 *Mimiviridae* family and suggested that PkV RF01, along with TetV and AaV, is more  
 258 closely related to Mesomimivirinae than to Megavirinae (Figure 3A). In support of  
 259 this evolutionary relationship, PkV RF01 has an additional copy of the second largest  
 260 RNA polymerase subunit gene (*rpb2*). This *rpb2* duplication is shared with all other  
 261 *Mimiviridae* that infect algae, including Mesomimivirinae members, AaV (whose  
 262 second copy is very short), and TetV. This additional *rpb2* copy is not found in other  
 263 *Mimiviridae*. Phylogenetic analysis indicates that these two *rpb2* copies were present  
 264 in the ancestor of alga-infecting *Mimiviridae* (Figure 3B). The *rpb2* duplication is a  
 265 useful feature to discriminate between the two main clades (autotroph versus  
 266 heterotroph-infecting viruses) within the *Mimiviridae* family.

267 **Figure 3.**  
 268 **Phylogenetic evidence for PkV RF01 as a distant relative of**  
 269 **“Mesomimivirinae.”**

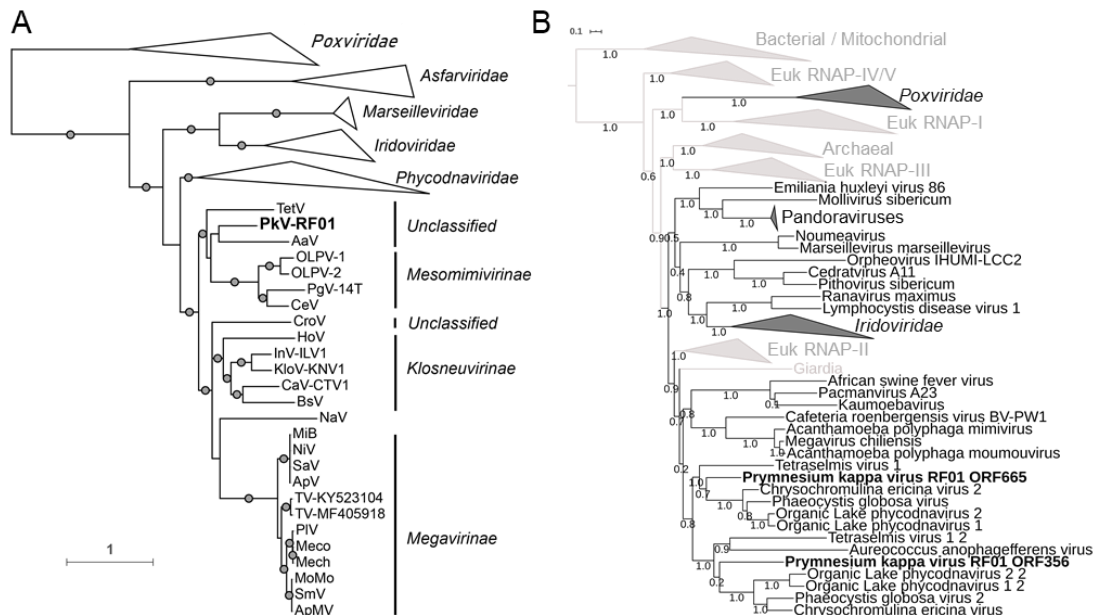

270  
 271 (A) Bayesian phylogenetic tree of NCLDVs reconstructed from a concatenated  
 272 alignment of five core nucleocytoplasmic virus orthologous genes. Gray circles  
 273 indicate branches statistically supported by posterior probabilities above 0.95. The  
 274 tree was rooted using *Poxviridae* as outgroup. The scale bar indicates substitutions  
 275 per site. TetV, Tetraselmis Virus 1; AaV, *Aureococcus anophagefferens* virus; OLPV-

276 1, Organic Lake phycodnavirus 1; OLPV-2, Organic Lake phycodnavirus 2; PgV-14T,  
277 *Phaeocystis globosa* virus; CeV, *Chrysochromulina ericina* virus; CroV, *Cafeteria*  
278 *roenbergensis* virus BV-PW1; HoV, Hokovirus HKV1; InV-ILV1, Indivirus ILV1; KloV-  
279 KNV1, Klosneuvirus KNV1; CaV-CTV1, Catovirus CTV1; BsV, *Bodo saltans* virus;  
280 NaV, Namao Virus; MiB, Mimivirus\_Bombay; NiV, Niemeyer virus; SaV, Samba  
281 virus; ApV, *Acanthamoeba polyphaga* virus; TV-KY523104, Tupanvirus KY523104;  
282 TV-MF405918, Tupanvirus MF405918; PIV, Powai Lake megavirus; Meco,  
283 Megavirus courdo 7; Mech, Megavirus chilensis; MoMo, Moumouvirus Monve; SmV,  
284 Saudi moumouvirus; ApMV, *Acanthamoeba polyphaga* moumouvirus. (B) Maximum  
285 likelihood phylogenetic tree of cellular and NCLDV DNA-directed RNA polymerase  
286 subunit beta (RPB2). Tools, evolutionary models, and parameters used for tree  
287 reconstruction are reported in [Appendix 1 – Table S3](#).

288

289 Out of 1,121 predicted protein-coding genes in the genome of PkV RF01, only  
290 about a third could be annotated with some functional description based on their  
291 sequence homology with characterized proteins. Such a small percentage is typical of  
292 eukaryotic viruses with large genomes. A total of 339 proteins (30%) showed  
293 significant sequence similarity with proteins in the Cluster of Orthologous Gene  
294 (COG) database (Tatusov et al., 2000) ([Figure 2 – figure supplement 2](#)). The  
295 distribution of COG functions associated with these hits was dominated by  
296 “Posttranslational modification, protein turnover, chaperones” (43 proteins) and “Cell  
297 wall/membrane/envelope biogenesis” (42 proteins), which is approximately two times  
298 more proteins than in other *Mimiviridae* members except for Tupanvirus ([Figure 2 –](#)  
299 [figure supplement 3](#)). Among other well-represented categories, numbers of proteins  
300 in “Replication, recombination and repair” (36 proteins) and “Transcription” (23  
301 proteins) were similar to those of other *Mimiviridae*, while the categories of  
302 “Translation, ribosomal structure and biogenesis” (25 proteins) and “Amino acid  
303 transport and metabolism” (20 proteins) were respectively in the same range or higher  
304 than those of heterotroph-infecting *Mimiviridae* (mimiviruses, BsV, and CroV).

305 Interestingly, 24, 17, and 9 PkV RF01 proteins were respectively assigned to the  
306 categories of “Lipid transport and metabolism”, “Carbohydrates transport and  
307 metabolism,” and “Energy production and conservation,” all much higher compared  
308 with other *Mimiviridae* viruses.

309         Similar to other *Mimiviridae*, PkV RF01 encodes several genes involved in  
310 DNA repair, transcription, and translation ([Appendix – Results](#)). Notably, this virus  
311 has the full set of enzymes required for the base excision repair (BER) pathway,  
312 which is also the case for all *Mimiviridae* members except for those with smaller  
313 genomes (PgV, CeV, and AaV). PkV RF01 BER enzymes are closer (i.e., have a  
314 greater alignment score) to heterotrophic *Mimiviridae* than to cellular homologs, thus  
315 suggesting that this pathway was present in the last common ancestor of *Mimiviridae*.  
316 According to a previous phylogenetic analysis, *Mimiviridae* BER enzymes are  
317 monophyletic with regard to *Mimiviridae* and have not recently been acquired from  
318 eukaryotes (Blanc-Mathieu and Ogata, 2016).

319         Unlike alga-infecting *Mimiviridae*, PkV RF01 encodes two amino-acyl tRNA  
320 synthetases (aaRS): an isoleucyl-tRNA synthetase (IleRS; ORF 480) and an  
321 asparaginyl-tRNA synthetase (AsnRS; ORF 764). Both of these synthetases are found  
322 in most lineages of heterotroph-infecting *Mimiviridae* (AsnRS is missing from CroV  
323 and BsV, and IleRS is missing from *Mimivirus* lineage A). Phylogenetic analyses of  
324 these two proteins revealed a deep branching of viral homologs, which formed a  
325 monophyletic clade well separated from cellular homologs ([Figure 4](#)). Although the  
326 phylogenetic relationship among viruses on these trees does not exactly reflect their  
327 classification (e.g., Orpheovirus within Megavirinae), the recovered topologies  
328 suggest an ancient history for these genes rather than a recent acquisition from  
329 cellular organisms. The IleRS tree ([Figure 4A](#)) is in agreement with previous

330 phylogenetic analyses of cellular organisms with the known split of bacterial lineages  
331 (Cvetesic et al., 2016; Wolf et al., 1999). In our tree, *Mimiviridae* and Orpheovirus  
332 form a monophyletic group branching at the root of eukaryotic organisms, which  
333 suggests that the IleRS gene was acquired before the divergence of extant eukaryotic  
334 phyla or from a now-extinct or as yet unknown eukaryotic phylum at the root of the  
335 eukaryotic tree. Similarly, the AsnRS tree supports the presence of this enzyme in the  
336 ancestor of *Mimiviridae* (Figure 4B). Alternatively, rapid evolution of more recently  
337 acquired genes could generate these observed topologies in a phenomenon known as  
338 the long-branch attraction bias (Felsenstein, 1978). Nonetheless the branches for  
339 viruses were not particularly long compared to the branches for eukaryotes and the  
340 evolutionary model used in our phylogenetic analyses is known to minimize this bias  
341 (compared to more traditional models) (Lartillot et al., 2007; Moreira and López-  
342 García, 2015). Therefore, it seems more likely that viral genes were recruited from  
343 proto-eukaryotes before the diversification of modern eukaryotes.

344 **Figure 4.**  
345 **Bayesian phylogenetic trees of two viral amino-acyl tRNA synthetases and**  
346 **their cellular homologs.**

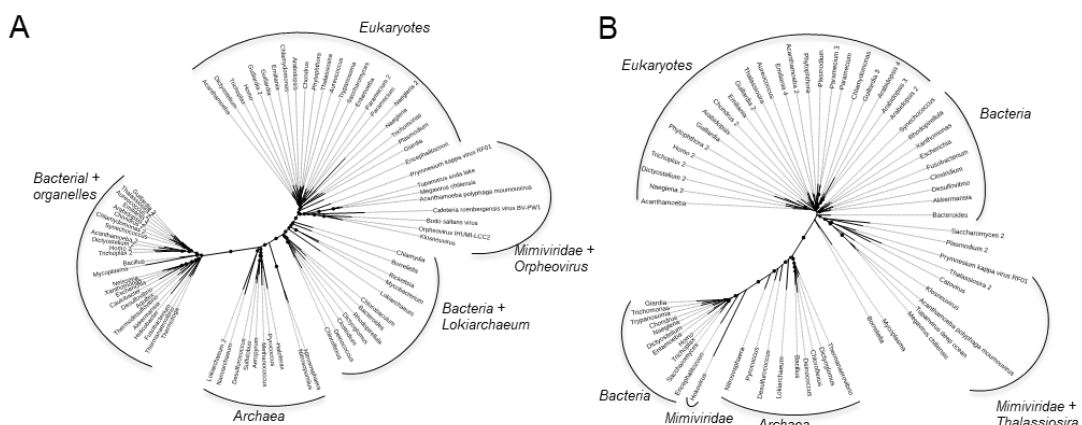

347  
348 (A) Isoleucine tRNA synthetases. (B) Aspartyl tRNA synthetases. Branches supported  
349 by posterior probability (PP) values >70% are indicated by circles whose diameters  
350 are proportional to the PP value.

351 **A viral-encoded succinate dehydrogenase and energy production genes**

352 We found six predicted protein-coding genes (ORFs 893 to 900) related to energy  
 353 production in an 8,026-bp region (Figure 5A). Four ORFs (ORFs 893 and 898–900)  
 354 were predicted to code for all four subunits (SDHA, D, C, and B) of a functional  
 355 succinate dehydrogenase (SDH, or Electron Transport Chain Complex II) of the  
 356 oxidative phosphorylation pathway (Figure 5B). In eukaryotes, all four subunits of  
 357 this enzyme are encoded in the nuclear genome. This enzyme acts in the  
 358 mitochondrial respiratory chain and participates in both the TCA cycle and the  
 359 respiratory electron transfer chain. In the TCA cycle, this succinate dehydrogenase  
 360 oxidizes succinate to fumarate, while its activity in the inner mitochondrial membrane  
 361 involves the reduction of a FAD cofactor followed by electron transfer through three  
 362 Fe–S centers to ubiquinone (Figure 5C).

363 **Figure 5.**

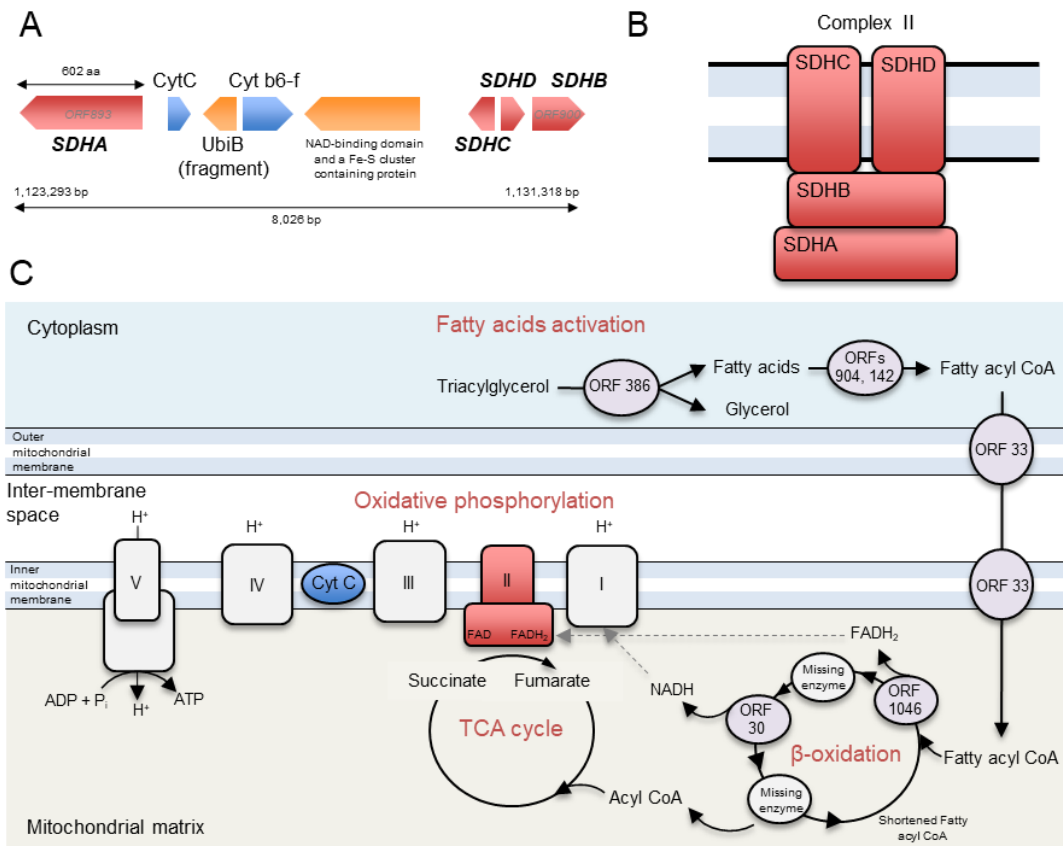

364



365 **Genes in PkV RF01 predicted to encode enzymes of oxidative phosphorylation**  
366 **and  $\beta$ -oxidation pathways.**

367 (A) Gene organization in the succinate dehydrogenase-containing region. (B)  
368 Schematic representation of the canonical enzymatic complex II in the mitochondrial  
369 membrane. (C) Location of succinate dehydrogenase in the TCA cycle and electron  
370 transport chain as known in plants and a schematic reconstruction of the PkV RF01-  
371 encoded  $\beta$ -oxidation metabolic pathway.

372

373 *SDH* genes have not been previously observed in a virus genome. In a RT-  
374 PCR experiment using primers specific for the PkV RF01 gene for SDHA (hereafter,  
375  $\nu$ SDHA), we detected transcripts of this gene in samples collected 24, 72, and 96 h  
376 post infection (Figure 6). The  $\nu$ SDHA primers were tested on an uninfected culture to  
377 ensure that only the viral version of the *SDHA* gene was amplified (Figure 5 – figure  
378 supplement 4). The MCP gene of PkV RF01 was used both for protocol optimization  
379 and later as an internal positive control (Appendix 1 – Materials and Methods; Figure  
380 6 – figure supplement 5). Although the transcription of the viral *SDHA* suggests that  
381 the viral SDH is functional, we can only speculate on the possible role of this enzyme  
382 during infection. One possibility is that the viral SDH sustains the carbohydrate  
383 metabolism of infected cells (i.e., virocells) to supply building blocks of viral particles  
384 such as amino acids and to support proper replication of this large virus. Another  
385 possibility is that PkV RF01 uses its SDH as a part of an arms race with its host to  
386 turn on the TCA cycle after the host had turned it off to counter viral replication, or  
387 more simply to boost the energy metabolism of the virocells to augment the fitness of  
388 the host and/or to maximize virus production efficiency.

389

390

391

392

393 **Figure 6.**

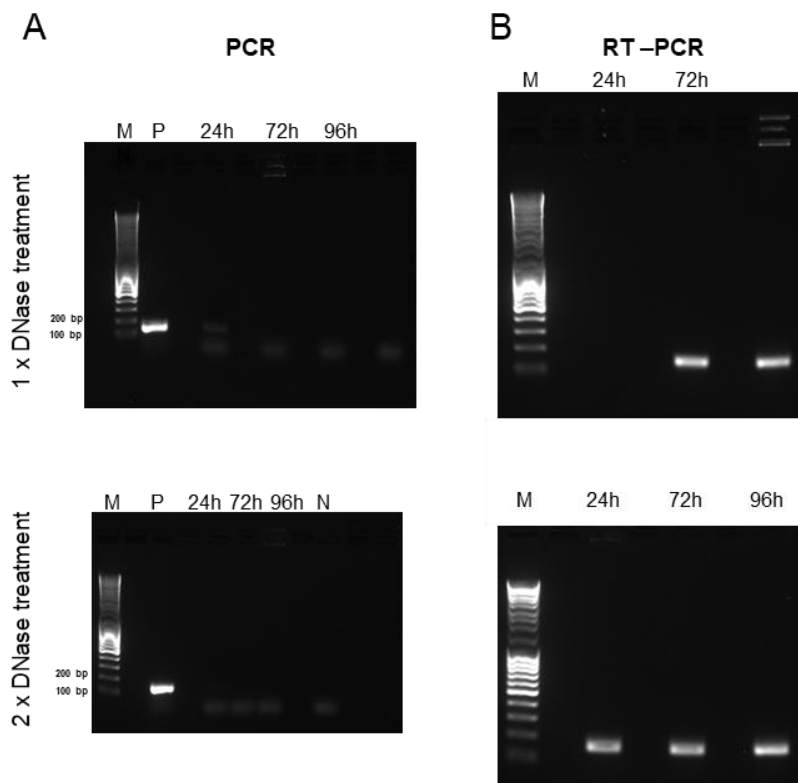

394

395 **The viral SDHA gene is transcribed during infection.**

396 Gels of PCR and RT-PCR in combination with a TURBO DNA-free kit. Samples were  
397 taken 24, 72, and 96 h after infection. (A) PCR with *vSDHA*-specific primers was  
398 used to check for the presence of genomic DNA after RNA isolation and 1× and 2×  
399 DNase treatments. P, positive control (PKV RF01 genomic DNA); N, negative control  
400 (sdH<sub>2</sub>O). (B) RT-PCR of RNA samples using *vSDHA*-specific primers. M, DNA  
401 marker (MassRuler DNA Ladder Mix, Thermo Fisher, 80 to 10,000 bp).

402

403 The discovery of the viral SDH prompted us to search for other potential viral-  
404 encoded SDHA and SDHB homologs in marine metagenomes. These two subunits  
405 (SDHA and SDHB) form the catalytic core containing the redox cofactors that  
406 participate in electron transfer to ubiquinone; they are thus more conserved than  
407 SDHC and SDHD subunits. To test for the presence of this viral SDH in other viruses,  
408 we searched for *vSDHA* and *B* in marine metagenomes of the *Tara* Oceans  
409 expedition. The 50 most-similar and non-redundant SDHA and B sequences predicted  
410 from 101 *Tara* Oceans genome fragments were most likely derived from *Mimiviridae*

411 viruses (Figure 7). Indeed, out of 1,113 genes predicted from these 101 genome  
412 fragments, 681 were annotated at some taxonomic level, of which 449 were predicted  
413 to be cellular and 157 viral. Of the 157 viral genes, 146 and 130 had their last  
414 common ancestor in *Mimiviridae* and Mesomimivirinae, respectively. A total of 32 of  
415 the 101-genome fragments contained at least one gene predicted to be of *Mimiviridae*  
416 origin, and the larger the genome fragment, the more *Mimiviridae* genes it was found  
417 to encode (Figure 7A). Functional analysis indicated that 12 of the 1,113 predicted  
418 genes were NCLDV hallmark genes (encoding five VLTF3s, two capsid proteins, two  
419 PCNAs, two helicases, and one PolB). The high proportion of unknown genes and  
420 genes annotated as *Mimiviridae* in the 101 *Tara* Oceans genome fragments encoding  
421 SDHA or SDHB strongly suggests that these fragments belong to *Mimiviridae*  
422 viruses. This finding demonstrates that the presence of SDH is not restricted to PkV  
423 RF01 and is arguably widespread among marine *Mimiviridae*. According to  
424 phylogenetic analyses of cellular and viral SDHA and SDHB, the viral homologs  
425 form a monophyletic group that branches deeply within eukaryotic lineages (Figure  
426 7B-C). Long-branch attraction bias could generate such topologies but, as explained  
427 above for the IleRS and AsnRS, it is more likely that the viral SDHA and SDHB were  
428 acquired at an early stage in the radiation of eukaryotic lineages. The transcription of  
429  $\nu$ SDHA and its occurrence in marine environments calls for further investigation to  
430 understand the biological role and co-evolutionary significance of this viral SDH.

431 Other genes related to energy production were detected in the 8,026 bp-long  
432 region. ORF 894 and ORF 896, respectively corresponding to cytochrome *c* (CytC)  
433 and cytochrome b6-f complex iron-sulfur (Cyt b6-f) subunits, showed high sequence  
434 conservation with *Chrysochromulina* sp. CCMP291 proteins (78% and 59% amino  
435 acid [aa] identities, respectively). CytC is a short protein (~100 aa) involved in the

436 oxidative phosphorylation pathway, where it accommodates the transfer of electrons  
437 between the coenzymes Q-cytochrome *c* reductase (complex III) and cytochrome *c*  
438 oxidase (complex IV). The presence of Cyt b6-f between oxidative phosphorylation  
439 genes is puzzling because the cytochrome b6-f complex is involved in photosynthesis.  
440 The core of the chloroplast b6f complex, however, is similar to the analogous  
441 respiratory cytochrome bc(1) complex. The other two predicted ORFs in this region  
442 are similar to ubiquinone biosynthesis protein UbiB (ORF 895) or contain a NAD-  
443 binding domain and a Fe-S cluster (ORF 897) and may thus be associated with  
444 electron transport as well. ORF 897 has two distant (25%–31% aa identity) homologs  
445 in the PkV RF01 genome (ORF 456 and ORF 625).

446         Some other genes were predicted to encode enzymes involved in pyruvate  
447 metabolism. ORF 79 has sequence homology with L-lactate dehydrogenases; it might  
448 thus catalyze the conversion of lactate to pyruvate, an intermediary compound serving  
449 as a starting point for several major metabolic pathways, such as glycolysis,  
450 gluconeogenesis, and the TCA cycle. ORF 727 was predicted to code for an  
451 isochorismate hydrolase that also produces pyruvate from isochorismate. ORF 24 and  
452 ORF 726 share sequence homology with phosphoenolpyruvate synthase and a partial  
453 pyruvate kinase, respectively. The former catalyzes the conversion of pyruvate to  
454 phosphoenolpyruvate (PEP), while the latter catalyzes the reverse reaction. Formation  
455 of PEP is an initial step in gluconeogenesis.

456  
457  
458  
459  
460  
461  
462  
463

464 **Figure 7.**

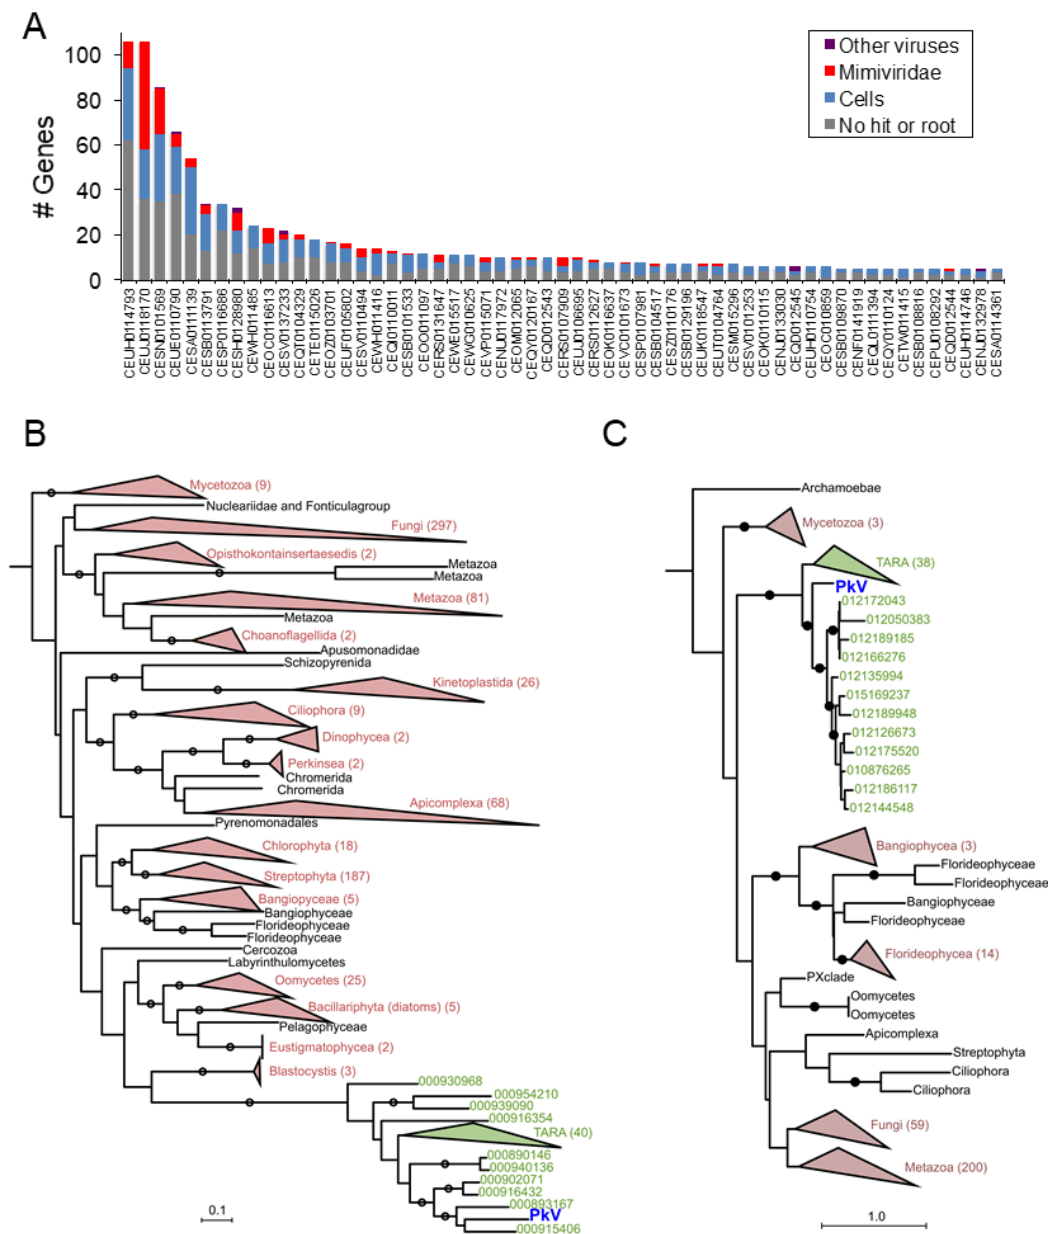

465

466 **Origin of PkV RF01 SDHA and SDHB and their most similar homologs in *Tara***  
 467 **Oceans metagenomes.**

468 (A) Taxonomy of genes predicted in *Tara* Oceans metagenome assembled-genome  
 469 fragments encoding the 50 SDHAs and SDHBs most similar to PkV RF01 genes (for  
 470 genome fragments having at least five predicted genes). (B and C) Phylogenetic  
 471 trees of viral and cellular SDHAs (B) and SDHBs (C). Clades in green contain PkV  
 472 RF01 SDHA or SDHB and their 50 most similar hits identified in *Tara* Oceans  
 473 metagenomes (predicted to be *Mimiviridae* homologs from A). Red, eukaryotic phyla;  
 474 black, unclassified eukaryotes. Trees are rooted with Proteobacteria and Firmicutes  
 475 homologs (not shown). Circles indicate branches with posterior probability support  $\geq$   
 476 50%.

## 477 **A nearly complete viral-encoded $\beta$ -oxidation pathway**

478 In this study, 22 predicted genes were inferred to code for proteins involved in lipid  
479 synthesis or degradation, including key enzymes of the  $\beta$ -oxidation pathway  
480 ([Appendix 1 – Table S2](#)). Several genes were predicted to code for lipase-like  
481 proteins (ORFs 386, 481, 635, 653, and 690), including a triacylglycerol lipase (ORF  
482 386) that can break down triacylglycerol into glycerol and fatty acids. Glycerol and  
483 fatty acids can be used as a starting point for ATP production—by glycolysis and  $\beta$ -  
484 oxidation, respectively. In the  $\beta$ -oxidation pathway, fatty acids are fully oxidized to  
485 produce acetyl-CoA, which can then enter the TCA cycle to yield NADH and  
486 FADH<sub>2</sub>; these latter two products can funnel through to the electron transport chain to  
487 produce ATP ([Figure 5C](#)). Each  $\beta$ -oxidation cycle itself also produces NADH and  
488 FADH<sub>2</sub> cofactors. We found that PkV RF01 encodes key  $\beta$ -oxidation enzymes. First,  
489 two distantly related ORFs (ORF 142 and ORF 904 sharing 22% aa identity) have  
490 sequence homology with a long-chain fatty acyl-CoA synthetase. This enzyme  
491 catalyzes the formation of fatty acyl-CoA in the cytosol. Fatty acyl-CoA can be  
492 imported to mitochondria using a (carnitine) CoA-transferase also encoded in PkV  
493 RF01 (ORF 33). Once in the mitochondrial matrix, fatty acyl-CoA serves as a  
494 substrate on which an acyl-CoA dehydrogenase (ORF 1046) oxidizes the fatty acyl-  
495 CoA and reduces a FAD cofactor to produce a FADH<sub>2</sub> cofactor. We identified a 2,4-  
496 dienoyl-CoA reductase (ORF 30) that may facilitate the next oxidation step to  
497 produce a NADH cofactor. FADH<sub>2</sub> and NADH molecules produced by a  $\beta$ -oxidation  
498 cycle can both be oxidized in the electron transport chain to generate ATP. The  
499 enzymes involved in the two intermediate steps following each oxidation, either an  
500 enoyl-CoA hydratase or a  $\beta$ -ketothiolase, were not detected in our analysis.

501 Most of these genes have no homologs in reference viral genomes, and, to our  
502 knowledge, this is the first report of a virus possessing proteins directly involved in  
503 lipid-based energy production. By diverting host lipid machinery, interactions of  
504 viruses with lipids or lipid based-structures have long been known to have structural  
505 or signaling roles at different stages of the virus life cycle, such as entry, genome  
506 replication, morphogenesis, and exit (Heaton and Randall, 2011; Lange et al., 2019;  
507 Ono, 2010). More recently, several studies on human viruses (two herpesviruses and  
508 one RNA virus) have shown that the metabolic state of an infected cell can be shifted  
509 toward energy generation to support viral replication (Heaton and Randall, 2011).  
510 These studies have highlighted the increasing abundance—up to 48 h after HCV  
511 infection—of enzymes involved in  $\beta$ -oxidation, amino acid catabolism, and the TCA  
512 cycle (Diamond et al., 2010) and an increase in cellular  $\beta$ -oxidation following the  
513 release of free fatty acids caused by Dengue virus-induced autophagy (Heaton and  
514 Randall, 2010). Among algal viruses, EhV remodels the transcription of host lipid  
515 genes for fatty acid synthesis to support viral assembly (Rosenwasser et al., 2014) and  
516 also to generate triacylglycerols stored in the virion and available as an energy pool in  
517 later infection phases (Malitsky et al., 2016). Besides diverting the host metabolism,  
518 EhV encodes seven proteins involved in the sphingolipid biosynthesis pathway  
519 (Wilson et al., 2005). This pathway produces a viral sphingolipid that is a central  
520 component of EhV lipid membranes and that can also act as a signaling lipid and  
521 induce programmed cell death during the lytic infection phase (Vardi et al., 2009). EhV  
522 also encodes a triglyceride lipase (with detectable homology to predicted PkV RF01  
523 lipases ORF 635 and ORF653) that is highly expressed during late infection  
524 concomitantly with significant up-regulation of host  $\beta$ -oxidation genes (Rosenwasser  
525 et al., 2014). These examples and our observations of several genes involved in  $\beta$ -

526 oxidation clearly show that viruses can introduce new metabolism-related genes,  
527 sometimes representing entire pathways, into the host, most likely to satisfy the high  
528 metabolic requirement of these giant viruses.

### 529 **High representation of glycosyltransferases**

530 Compared with other viruses, PkV RF01 was found to encode an unusually high  
531 number of glycosyltransferases (GTs) as well as other carbohydrate-active enzymes  
532 ([Appendix 1 – Results](#)). Automated annotation of GTs (and other carbohydrate-active  
533 enzymes) in reference viral proteomes using dbCAN2 (Zhang et al., 2018) revealed  
534 that the largest number of GT domains was encoded by PkV RF01 ( $n = 48$ ), followed  
535 by CeV ( $n = 13$ ), *Mimivirus* members, and CroV and AaV ( $n = 8–10$ ) ([Figure 5 –](#)  
536 [figure supplement 6](#)). We uncovered 48 GT domains encoded in 40 ORFs, 8 of which  
537 were predicted to encode more than one GT domain. These domains correspond to 16  
538 different GT families. Most domains were inferred to be functional, as 31 out of 48  
539 covered at least 70% of the dbCAN2 reference domain, with coverage ranging from  
540 44% to 99%. GTs were found scattered across the genome of PkV RF01 but with  
541 some local clustering ([Figure 2A](#)), the latter indicating possible involvement in the  
542 same pathway. GT32 was the most represented domain, with 11 proteins (as  
543 annotated by dbCAN2) and potentially three additional proteins (ORFs 40, 84, and  
544 861). Eight proteins possessed a GT25 domain that can catalyze the transfer of  
545 various sugars onto a growing lipopolysaccharide chain during its biosynthesis.  
546 Among these eight predicted ORFs, four contained an additional non-overlapping GT  
547 domain (two GT2s, one GT6, and one GT60). Functional analyses of GTs in  
548 mimiviruses (or in related *Paramecium bursaria* Chlorella viruses) have demonstrated  
549 that some of these enzymes are functional, being able to modify viral collagen-like  
550 proteins (Luther et al., 2011) and polymerize sugars (Rommel et al., 2016).



551 Conservation between PkV RF01 GTs and functionally characterized GTs in viruses  
552 and cells is absent or extremely low, which precludes any predictions as to the  
553 specific roles of these enzymes in the PkV RF01 life cycle. Nevertheless, this putative  
554 glycosylation-conducive autonomy possibly allows the virus to infect a variety of  
555 hosts, as the virus can modify its own glycans, which are used for host recognition,  
556 independently of the host system (Parakkottil Chothi et al., 2010). In alpha-, flavi-,  
557 and herpes-viruses, fusion is mediated by viral glycoproteins (Huisken and  
558 Butcher, 2007).

## 559 **Conclusions**

560 The haptophyte virus PkV RF01 has been previously shown to have a longer  
561 replication cycle and a broader host range compared with other prymnesioviruses and  
562 most other algal viruses. Here, we revealed that PkV RF01 has atypical virion  
563 morphology and that infections yield several orders of magnitude fewer infectious  
564 particles than other tested prymnesioviruses. In-depth phylogenetic analysis using  
565 genes conserved in NCLDV s confirmed that PkV RF01 belongs to *Mimiviridae* but is  
566 deeply diverged from existing members, although closer to alga-infecting  
567 *Mimiviridae* than heterotroph-infecting ones. Unlike other alga-infecting *Mimiviridae*,  
568 however, PkV RF01 has a large genome (1.4 MB) and contains genes coding for two  
569 aminoacyl-tRNA synthetases and the complete BER pathway. All these features are  
570 conserved in most heterotrophic *Mimiviridae* and therefore must have been lost in  
571 other alga-infecting *Mimiviridae*. This outlier virus features an unprecedentedly high  
572 number of genes involved in energy metabolism and glycosylation machinery that  
573 may enable its longer replication cycle and broader host range compared with other  
574 algal viruses. These genomic and phenotypic features are suggestive of a persistent

575 infection behavior that probably evolved in response to the host growth strategy.  
576 Because of nutrient limitations, these persistent systems of slow-growing but  
577 ubiquitous hosts with less virulent viruses may represent the most common type of  
578 virocells in oceans.

## 579 **Materials and Methods**

### 580 **PkV RF01 culturing and characterization**

581 Detailed materials and methods are provided in [Appendix 1 – Materials and Methods](#).  
582 The details include information on culturing and infection, virus infectivity,  
583 sensitivity to chloroform, cryo-electron tomography, purification of viral particles and  
584 DNA isolation, and amplification and RT-PCR of *vSDHA*.

585 In brief, exponentially growing cultures of He UiO028 were infected with  
586 PkV RF01 at a virus-to-alga ratio of 10 to facilitate a one-step virus growth cycle  
587 (Johannessen et al., 2015). Infection was followed by flow cytometry counting  
588 (Brussaard, 2004; Marie et al., 1999) to measure total VLPs and host cells.  
589 Furthermore, virus infectivity was determined by MPN (Suttle and Chan, 1993) using  
590 He UiO028 as host and compared with that of two other prymnesioviruses, HeV  
591 RF02 and PkV RF02 (Johannessen et al., 2015), propagated on He UiO028 and  
592 *Prymnesium kappa* RCC3423, respectively. Sensitivity to chloroform, which suggests  
593 the presence of a lipid membrane or lipid molecules in the capsid, was tested in  
594 triplicate samples of exponentially growing HeUiO028 cells infected with a 1:10  
595 volume of chloroform-treated PkV RF01 virus.

596 The structure of PkV RF01 was determined by cryo-electron tomography  
597 using a 200-kV transmission electron microscope (Talos F200C, Thermo Scientific)  
598 equipped with a Ceta 16M camera. Tilt series were recorded at 45,000× magnification

599 and  $-7\text{-}\mu\text{m}$  defocus between  $-60^\circ$  to  $60^\circ$  by  $2^\circ$  increments. Finally, reconstruction,  
600 segmentation, and visualization of tomograms was performed with the software  
601 package IMOD v4.9 (Kremer et al., 1996).

602 Transcription of *vSDHA* was determined in an infected He UiO028 and PkV  
603 RF01 culture using an uninfected He UiO028 culture as a control. Samples were  
604 collected at 24, 72, and 96 h post infection from both cultures. RNA was extracted  
605 using the RNeasy Plus Universal Mini kit (Qiagen), with gDNA removed in an extra  
606 step using a TURBO DNA-free kit (Ambion). RT-PCRs were performed on the  
607 isolated mRNA using a SuperScript III One-Step RT-PCR with Platinum *Taq* DNA  
608 Polymerase system (Thermo Fisher).

609 DNA for PkV RF01 genome sequencing was isolated from 2 L of lysed He  
610 UiO028 culture. Algal debris and bacteria were removed by low-speed centrifugation.  
611 Viral particles were concentrated by ultracentrifugation at 25,000 rpm in a Beckman  
612 Coulter Optima L90K ultracentrifuge for 2 h and further purified by Optiprep gradient  
613 centrifugation (Lawrence and Steward, 2010). Isolation of high-quality DNA for  
614 sequencing was performed using the protocol described in (Sandaa et al., 2018) with  
615 some modifications. Total DNA was purified using a Zymo Genomic DNA Clean &  
616 Concentrator Kit-10 (Zymo Research, Irvine, CA, USA).

### 617 **Genome sequencing, assembly, and annotation**

618 DNA isolated from PkV RF01 was subjected to Illumina TruSeq PCR-free library  
619 preparation (insert size: 350 bp) and sequenced on an Illumina MiSeq instrument in  
620 paired-end mode ( $2 \times 300$  bp), thereby yielding approximately 1.9 million reads. In  
621 addition, a ligation-based  $1\text{D}^2$  nanopore library (LSK-308) was constructed and  
622 sequenced using an Oxford Nanopore MinION Mk1b device and a FLO-MIN107 flow  
623 cell, which resulted in 825 long reads with an N50 of 13.6 kb comprising 9.89 Mb in

624 total. These data were assembled in a two-step process using Newbler (Margulies et al.,  
625 2005) and Consed (Gordon and Green, 2013), and the consensus sequence was polished  
626 using Nanopolish (Loman et al., 2015) and Pilon (Walker et al., 2014). Genes were  
627 predicted using GeneMarkS (Besemer et al., 2001) and tRNAscan-SE (Lowe and Chan,  
628 2016). Predicted protein sequences were searched against various public databases  
629 using BLASTP, and significant alignments served as the basis for manual investigation  
630 on the GenomeNet (<https://www.genome.jp>) server to assign putative functions.  
631 [Appendix 1 – Materials and Methods](#) contains further details on the genome assembly  
632 and annotation as well as specific methods used for reconstruction of each phylogenetic  
633 tree.

#### 634 **Data availability**

635 Raw sequence reads and PkV RF01 genome sequence were deposited at the European  
636 Bioinformatics Institute (EMBL-EBI) (<https://www.ebi.ac.uk>) under project name  
637 PRJEB37450. The complete video records of a cryo-electron tomogram of a PkV  
638 RF01 virion, sequence data, curated gene annotation table and multiple sequence  
639 alignment and phylogenetic trees as reported in this study are available at  
640 <https://github.com/RomainBlancMathieu/PkV-RF01>.

#### 641 **Acknowledgements**

642 The recording of tilt series was performed with the help of Sebastian Schultz at the  
643 Unit of Cellular Electron Microscopy, the Norwegian Radium Hospital. Initial  
644 sequencing (MiSeq and Pacbio) of PkV RF01 total DNA was performed at the  
645 Norwegian Sequencing Center (<https://www.sequencing.uio.no/>). We thank Hilde M.  
646 K. Stabell and Solveig Siqveland, Department of Biological Sciences, University of  
647 Bergen, Norway, for technical assistance with molecular biology experiments as well  
648 as Christian Rückert, Bielefeld University, for support in manual finishing of genome  
649 assembly. This work was supported by the Research Council of Norway project  
650 entitled “Uncovering the key players for regulation of phytoplankton function and  
651 structure: lesson to be learned from algal virus-haptophyte coexistence” (VirVar,  
652 project number 294364 to RAS). Additional funding was provided by the European  
653 Union Horizons 2020 research and innovation program, grant agreement no. 685778  
654 (“Virus-X”) to RAS and DB. This work was also supported by the Future  
655 Development Funding Program of  
656 the Kyoto University Research Coordination Alliance. HO was supported by  
657 JSPS/KAKENHI (No. 18H02279), and Scientific Research on Innovative Areas from  
658 the Ministry of Education, Culture, Science, Sports and Technology (MEXT) of Japan

659 (Nos. 16H06429, 16K21723, 16H06437). The Super Computer System, Institute for  
660 Chemical Research, Kyoto University, provided computational time. We thank  
661 Barbara Goodson, from Edanz Group ([www.edanzediting.com/ac](http://www.edanzediting.com/ac)), for editing the  
662 English text of a draft of this manuscript.

## 663 Competing interests

664 Authors declare having no competing interests.

## 665 References

- 666 Abrahão J, Silva L, Silva LS, Khalil JYB, Rodrigues R, Arantes T, Assis F, Boratto P,  
667 Andrade M, Kroon EG, Ribeiro B, Bergier I, Seligmann H, Ghigo E, Colson P,  
668 Lévassieur A, Kroemer G, Raoult D, Scola BL. 2018. Tailed giant  
669 Tupanvirus possesses the most complete translational apparatus of the  
670 known virosphere. *Nat Commun* **9**:1–12. doi:10.1038/s41467-018-  
671 03168-1
- 672 Anantharaman K, Duhaime MB, Breier JA, Wendt KA, Toner BM, Dick GJ. 2014.  
673 Sulfur Oxidation Genes in Diverse Deep-Sea Viruses. *Science* **344**:757–  
674 760. doi:10.1126/science.1252229
- 675 Baudoux A-C, Brussaard CPD. 2005. Characterization of different viruses  
676 infecting the marine harmful algal bloom species *Phaeocystis globosa*.  
677 *Virology* **341**:80–90. doi:10.1016/j.virol.2005.07.002
- 678 Berngruber TW, Froissart R, Choisy M, Gandon S. 2013. Evolution of Virulence in  
679 Emerging Epidemics. *PLOS Pathogens* **9**:e1003209.  
680 doi:10.1371/journal.ppat.1003209
- 681 Besemer J, Lomsadze A, Borodovsky M. 2001. GeneMarkS: a self-training method  
682 for prediction of gene starts in microbial genomes. Implications for  
683 finding sequence motifs in regulatory regions. *Nucleic Acids Res* **29**:2607–  
684 2618.
- 685 Blanc-Mathieu R, Ogata H. 2016. DNA repair genes in the Megavirales  
686 pangenome. *Current Opinion in Microbiology, Environmental microbiology*  
687 \* Special Section: Megaviromes **31**:94–100.  
688 doi:10.1016/j.mib.2016.03.011
- 689 Bratbak G, Jacobsen A, Heldal M, Nagasaki K, Thingstad F. 1998. Virus production  
690 in *Phaeocystis pouchetii* and its relation to host cell growth and nutrition.  
691 *Aquatic Microbial Ecology* **16**:1–9. doi:10.3354/ame016001
- 692 Brussaard CPD. 2004. Optimization of procedures for counting viruses by flow  
693 cytometry. *Appl Environ Microbiol* **70**:1506–1513.  
694 doi:10.1128/aem.70.3.1506-1513.2004
- 695 Brussaard CPD, Bratbak G, Baudoux A-C, Ruardij P. 2007. *Phaeocystis* and its  
696 interaction with viruses. *Biogeochemistry* **83**:201–215.  
697 doi:10.1007/s10533-007-9096-0
- 698 Castberg T, Thyrhaug R, Larsen A, Sandaa R-A, Heldal M, Etten JLV, Bratbak G.  
699 2002. Isolation and Characterization of a Virus That Infects *Emiliania*  
700 *Huxleyi* (haptophyta)1. *Journal of Phycology* **38**:767–774.  
701 doi:10.1046/j.1529-8817.2002.02015.x

- 702 Claverie J-M. 2006. Viruses take center stage in cellular evolution. *Genome*  
703 *Biology* **7**:110. doi:10.1186/gb-2006-7-6-110
- 704 Coy SR, Gann ER, Pound HL, Short SM, Wilhelm SW. 2018. Viruses of Eukaryotic  
705 Algae: Diversity, Methods for Detection, and Future Directions. *Viruses*  
706 **10**:487. doi:10.3390/v10090487
- 707 Cveticic N, Dulic M, Bilus M, Sostaric N, Lenhard B, Gruic-Sovulj I. 2016. Naturally  
708 Occurring Isoleucyl-tRNA Synthetase without tRNA-dependent Pre-  
709 transfer Editing. *J Biol Chem* **291**:8618–8631.  
710 doi:10.1074/jbc.M115.698225
- 711 Day T, Proulx SR. 2004. A General Theory for the Evolutionary Dynamics of  
712 Virulence. *The American Naturalist* **163**:E40–E63. doi:10.1086/382548
- 713 Diamond DL, Syder AJ, Jacobs JM, Sorensen CM, Walters K-A, Proll SC, McDermott  
714 JE, Gritsenko MA, Zhang Q, Zhao R, Metz TO, Camp DG, Waters KM, Smith  
715 RD, Rice CM, Katze MG. 2010. Temporal Proteome and Lipidome Profiles  
716 Reveal Hepatitis C Virus-Associated Reprogramming of Hepatocellular  
717 Metabolism and Bioenergetics. *PLoS Pathog* **6**.  
718 doi:10.1371/journal.ppat.1000719
- 719 Dupré JO. 2009. Varieties of Living Things: Life at the Intersection of Lineage and  
720 Metabolism. *Philosophy & Theory in Biology* **1**.  
721 doi:http://dx.doi.org/10.3998/ptb.6959004.0001.003
- 722 Egge ES, Johannessen TV, Andersen T, Eikrem W, Bittner L, Larsen A, Sandaa R-A,  
723 Edvardsen B. 2015. Seasonal diversity and dynamics of haptophytes in  
724 the Skagerrak, Norway, explored by high-throughput sequencing. *Mol Ecol*  
725 **24**:3026–3042. doi:10.1111/mec.13160
- 726 Felsenstein J. 1978. Cases in which Parsimony or Compatibility Methods Will be  
727 Positively Misleading. *Systematic Zoology* **27**:401–410.  
728 doi:10.2307/2412923
- 729 Forterre P. 2013. The virocell concept and environmental microbiology. *ISME J*  
730 **7**:233–236. doi:10.1038/ismej.2012.110
- 731 Forterre P. 2012. Virocell Concept, The In: John Wiley & Sons, Ltd, editor. ELS.  
732 Chichester, UK: John Wiley & Sons, Ltd. p. a0023264.  
733 doi:10.1002/9780470015902.a0023264
- 734 Fridman S, Flores-Urbe J, Larom S, Alalouf O, Liran O, Yacoby I, Salama F, Bailleul  
735 B, Rappaport F, Ziv T, Sharon I, Cornejo-Castillo FM, Philosof A, Dupont  
736 CL, Sánchez P, Acinas SG, Rohwer FL, Lindell D, Béjà O. 2017. A myovirus  
737 encoding both photosystem I and II proteins enhances cyclic electron flow  
738 in infected Prochlorococcus cells. *Nat Microbiol* **2**:1350–1357.  
739 doi:10.1038/s41564-017-0002-9
- 740 Gallot-Lavallée L, Blanc G, Claverie J-M. 2017. Comparative Genomics of  
741 Chrysochromulina Ericina Virus and Other Microalga-Infecting Large DNA  
742 Viruses Highlights Their Intricate Evolutionary Relationship with the  
743 Established Mimiviridae Family. *Journal of Virology* **91**:e00230-17.  
744 doi:10.1128/JVI.00230-17
- 745 Gordon D, Green P. 2013. Consed: a graphical editor for next-generation  
746 sequencing. *Bioinformatics* **29**:2936–2937.  
747 doi:10.1093/bioinformatics/btt515
- 748 Gowing MM. 1993. Large virus-like particles from vacuoles of phaeodarian  
749 radiolarians and from other marine samples. *Marine Ecology Progress*  
750 *Series* **101**:33–43.

- 751 Gran-Stadniczeňko S, Krabberød AK, Sandaa R-A, Yau S, Egge E, Edvardsen B.  
752 2019. Seasonal Dynamics of Algae-Infecting Viruses and Their Inferred  
753 Interactions with Protists. *Viruses* **11**:1043. doi:10.3390/v11111043
- 754 Gromov BV, Mamkaeva KA. 1981. A virus infection in the synchronized  
755 population of the *Chlorococcum minutum* zoospores. *Algological*  
756 *Studies/Archiv für Hydrobiologie, Supplement Volumes* 252–259.
- 757 Heaton NS, Randall G. 2011. Multifaceted roles for lipids in viral infection. *Trends*  
758 *Microbiol* **19**:368–375. doi:10.1016/j.tim.2011.03.007
- 759 Heaton NS, Randall G. 2010. Dengue virus induced autophagy regulates lipid  
760 metabolism. *Cell Host Microbe* **8**:422–432.  
761 doi:10.1016/j.chom.2010.10.006
- 762 Huiskonen JT, Butcher SJ. 2007. Membrane-containing viruses with icosahedrally  
763 symmetric capsids. *Curr Opin Struct Biol* **17**:229–236.  
764 doi:10.1016/j.sbi.2007.03.005
- 765 Huiskonen JT, Kivelä HM, Bamford DH, Butcher SJ. 2004. The PM2 virion has a  
766 novel organization with an internal membrane and pentameric receptor  
767 binding spikes. *Nat Struct Mol Biol* **11**:850–856. doi:10.1038/nsmb807
- 768 Hurwitz BL, Hallam SJ, Sullivan MB. 2013. Metabolic reprogramming by viruses  
769 in the sunlit and dark ocean. *Genome Biol* **14**:R123. doi:10.1186/gb-2013-  
770 14-11-r123
- 771 Jacobsen A, Bratbak G, Heldal M. 1996. Isolation and characterization of a virus  
772 infecting phaeocystis pouchetii (prymnesiophyceae)1. *Journal of*  
773 *Phycology* **32**:923–927. doi:10.1111/j.0022-3646.1996.00923.x
- 774 Johannessen TV, Bratbak G, Larsen A, Ogata H, Egge ES, Edvardsen B, Eikrem W,  
775 Sandaa R-A. 2015. Characterisation of three novel giant viruses reveals  
776 huge diversity among viruses infecting Prymnesiales (Haptophyta).  
777 *Virology* **476**:180–188. doi:10.1016/j.virol.2014.12.014
- 778 Johannessen TV, Larsen A, Bratbak G, Pagarete A, Edvardsen B, Egge ED, Sandaa  
779 R-A. 2017. Seasonal Dynamics of Haptophytes and dsDNA Algal Viruses  
780 Suggest Complex Virus-Host Relationship. *Viruses* **9**.  
781 doi:10.3390/v9040084
- 782 King AA, Shrestha S, Harvill ET, Bjørnstad ON. 2009. Evolution of Acute  
783 Infections and the Invasion-Persistence Trade-Off. *The American*  
784 *Naturalist* **173**:446–455. doi:10.1086/597217
- 785 King AM, Lefkowitz E, Adams MJ, Carstens EB. 2011. Virus Taxonomy: Ninth  
786 Report of the International Committee on Taxonomy of Viruses. Elsevier.
- 787 Klose T, Rossmann MG. 2014. Structure of large dsDNA viruses. *Biol Chem*  
788 **395**:711–719. doi:10.1515/hsz-2014-0145
- 789 Kremer JR, Mastrorarde DN, McIntosh JR. 1996. Computer visualization of three-  
790 dimensional image data using IMOD. *J Struct Biol* **116**:71–76.  
791 doi:10.1006/jsbi.1996.0013
- 792 Lange PT, Lagunoff M, Tarakanova VL. 2019. Chewing the Fat: The Conserved  
793 Ability of DNA Viruses to Hijack Cellular Lipid Metabolism. *Viruses*  
794 **11**:119. doi:10.3390/v11020119
- 795 Lartillot N, Brinkmann H, Philippe H. 2007. Suppression of long-branch  
796 attraction artefacts in the animal phylogeny using a site-heterogeneous  
797 model. *BMC Evolutionary Biology* **7**:S4. doi:10.1186/1471-2148-7-S1-S4
- 798 Lawrence JE, Steward GF. 2010. Purification of viruses by centrifugation In:  
799 Wilhelm S, Weinbauer M, Suttle C, editors. *Manual of Aquatic Viral*

- 800 Ecology. American Society of Limnology and Oceanography. pp. 166–181.  
801 doi:10.4319/mave.2010.978-0-9845591-0-7.166
- 802 Leggett HC, Buckling A, Long GH, Boots M. 2013. Generalism and the evolution of  
803 parasite virulence. *Trends Ecol Evol (Amst)* **28**:592–596.  
804 doi:10.1016/j.tree.2013.07.002
- 805 Lindell D, Jaffe JD, Johnson ZI, Church GM, Chisholm SW. 2005. Photosynthesis  
806 genes in marine viruses yield proteins during host infection. *Nature*  
807 **438**:86–89. doi:10.1038/nature04111
- 808 Lindell D, Sullivan MB, Johnson ZI, Tolonen AC, Rohwer F, Chisholm SW. 2004.  
809 Transfer of photosynthesis genes to and from Prochlorococcus viruses.  
810 *PNAS* **101**:11013–11018. doi:10.1073/pnas.0401526101
- 811 Loman NJ, Quick J, Simpson JT. 2015. A complete bacterial genome assembled de  
812 novo using only nanopore sequencing data. *Nat Methods* **12**:733–735.  
813 doi:10.1038/nmeth.3444
- 814 Lowe TM, Chan PP. 2016. tRNAscan-SE On-line: integrating search and context  
815 for analysis of transfer RNA genes. *Nucleic Acids Res* **44**:W54–57.  
816 doi:10.1093/nar/gkw413
- 817 Luther KB, Hülsmeier AJ, Schegg B, Deuber SA, Raoult D, Hennet T. 2011.  
818 Mimivirus collagen is modified by bifunctional lysyl hydroxylase and  
819 glycosyltransferase enzyme. *J Biol Chem* **286**:43701–43709.  
820 doi:10.1074/jbc.M111.309096
- 821 Malitsky S, Ziv C, Rosenwasser S, Zheng S, Schatz D, Porat Z, Ben-Dor S, Aharoni  
822 A, Vardi A. 2016. Viral infection of the marine alga *Emiliania huxleyi*  
823 triggers lipidome remodeling and induces the production of highly  
824 saturated triacylglycerol. *New Phytologist* **210**:88–96.  
825 doi:10.1111/nph.13852
- 826 Mann NH, Cook A, Millard A, Bailey S, Clokie M. 2003. Bacterial photosynthesis  
827 genes in a virus. *Nature* **424**:741–741. doi:10.1038/424741a
- 828 Margulies M, Egholm M, Altman WE, Attiya S, Bader JS, Bemben LA, Berka J,  
829 Braverman MS, Chen Y-J, Chen Z, Dewell SB, Du L, Fierro JM, Gomes XV,  
830 Godwin BC, He W, Helgesen S, Ho CH, Irzyk GP, Jando SC, Alenquer MLI,  
831 Jarvie TP, Jirage KB, Kim J-B, Knight JR, Lanza JR, Leamon JH, Lefkowitz  
832 SM, Lei M, Li J, Lohman KL, Lu H, Makhijani VB, McDade KE, McKenna MP,  
833 Myers EW, Nickerson E, Nobile JR, Plant R, Puc BP, Ronan MT, Roth GT,  
834 Sarkis GJ, Simons JF, Simpson JW, Srinivasan M, Tartaro KR, Tomasz A,  
835 Vogt KA, Volkmer GA, Wang SH, Wang Y, Weiner MP, Yu P, Begley RF,  
836 Rothberg JM. 2005. Genome sequencing in microfabricated high-density  
837 picolitre reactors. *Nature* **437**:376–380. doi:10.1038/nature03959
- 838 Marie D, Brussaard CPD, Thyrhaug R, Bratbak G, Vaultot D. 1999. Enumeration of  
839 Marine Viruses in Culture and Natural Samples by Flow Cytometry. *Appl*  
840 *Environ Microbiol* **65**:45–52.
- 841 Miller ES, Heidelberg JF, Eisen JA, Nelson WC, Durkin AS, Ciecko A, Feldblyum TV,  
842 White O, Paulsen IT, Nierman WC, Lee J, Szczypinski B, Fraser CM. 2003.  
843 Complete Genome Sequence of the Broad-Host-Range Vibriophage  
844 KVP40: Comparative Genomics of a T4-Related Bacteriophage. *J Bacteriol*  
845 **185**:5220–5233. doi:10.1128/JB.185.17.5220-5233.2003
- 846 Mizuno CM, Guyomar C, Roux S, Lavigne R, Rodriguez-Valera F, Sullivan MB,  
847 Gillet R, Forterre P, Krupovic M. 2019. Numerous cultivated and



- 848 uncultivated viruses encode ribosomal proteins. *Nature Communications*  
849 **10**:752. doi:10.1038/s41467-019-08672-6
- 850 Moreira D, López-García P. 2015. Evolution of viruses and cells: do we need a  
851 fourth domain of life to explain the origin of eukaryotes? *Philos Trans R*  
852 *Soc Lond B Biol Sci* **370**. doi:10.1098/rstb.2014.0327
- 853 Needham DM, Yoshizawa S, Hosaka T, Poirier C, Choi CJ, Hehenberger E, Irwin  
854 NAT, Wilken S, Yung C-M, Bachy C, Kurihara R, Nakajima Y, Kojima K,  
855 Kimura-Someya T, Leonard G, Malmstrom RR, Mende DR, Olson DK, Sudo  
856 Y, Sudek S, Richards TA, DeLong EF, Keeling PJ, Santoro AE, Shirouzu M,  
857 Iwasaki W, Worden AZ. 2019. A distinct lineage of giant viruses brings a  
858 rhodopsin photosystem to unicellular marine predators. *PNAS*  
859 **116**:20574–20583. doi:10.1073/pnas.1907517116
- 860 Nishimura Y, Watai H, Honda T, Mihara T, Omae K, Roux S, Blanc-Mathieu R,  
861 Yamamoto K, Hingamp P, Sako Y, Sullivan MB, Goto S, Ogata H, Yoshida T.  
862 2017. Environmental Viral Genomes Shed New Light on Virus-Host  
863 Interactions in the Ocean. *mSphere* **2**. doi:10.1128/mSphere.00359-16
- 864 Ono A. 2010. Viruses and Lipids. *Viruses* **2**:1236–1238. doi:10.3390/v2051236
- 865 Parakkottil Chothi M, Duncan GA, Armirotti A, Abergel C, Gurnon JR, Van Etten JL,  
866 Bernardi C, Damonte G, Tonetti M. 2010. Identification of an l-Rhamnose  
867 Synthetic Pathway in Two Nucleocytoplasmic Large DNA Viruses. *J Virol*  
868 **84**:8829–8838. doi:10.1128/JVI.00770-10
- 869 Peralta B, Gil-Carton D, Castaño-Díez D, Bertin A, Boulogne C, Oksanen HM,  
870 Bamford DH, Abrescia NGA. 2013. Mechanism of Membranous Tunnelling  
871 Nanotube Formation in Viral Genome Delivery. *PLOS Biology*  
872 **11**:e1001667. doi:10.1371/journal.pbio.1001667
- 873 Philippe C, Krupovic M, Jaomanjaka F, Claisse O, Petrel M, le Marrec C. 2018.  
874 Bacteriophage GC1, a Novel Tectivirus Infecting *Gluconobacter Cerinus*,  
875 an Acetic Acid Bacterium Associated with Wine-Making. *Viruses* **10**.  
876 doi:10.3390/v10010039
- 877 Piacente F, Gaglianone M, Laugieri ME, Tonetti MG. 2015. The Autonomous  
878 Glycosylation of Large DNA Viruses. *International Journal of Molecular*  
879 *Sciences* **16**:29315–29328. doi:10.3390/ijms161226169
- 880 Raoult D, Audic S, Robert C, Abergel C, Renesto P, Ogata H, La Scola B, Suzan M,  
881 Claverie J-M. 2004. The 1.2-megabase genome sequence of Mimivirus.  
882 *Science* **306**:1344–1350. doi:10.1126/science.1101485
- 883 Raoult D, Forterre P. 2008. Redefining viruses: lessons from Mimivirus. *Nat Rev*  
884 *Microbiol* **6**:315–319. doi:10.1038/nrmicro1858
- 885 Rommel AJ, Hülsmeier AJ, Jurt S, Hennes T. 2016. Giant mimivirus R707 encodes  
886 a glycogenin paralogue polymerizing glucose through  $\alpha$ - and  $\beta$ -glycosidic  
887 linkages. *Biochem J* **473**:3451–3462. doi:10.1042/BCJ20160280
- 888 Rosenwasser S, Mausz MA, Schatz D, Sheyn U, Malitsky S, Aharoni A, Weinstock  
889 E, Tzfadia O, Ben-Dor S, Feldmesser E, Pohnert G, Vardi A. 2014. Rewiring  
890 Host Lipid Metabolism by Large Viruses Determines the Fate of *Emiliana*  
891 *huxleyi*, a Bloom-Forming Alga in the Ocean[C][W][OPEN]. *Plant Cell*  
892 **26**:2689–2707. doi:10.1105/tpc.114.125641
- 893 Rosenwasser S, Ziv C, Creveld SG van, Vardi A. 2016. Virocell Metabolism:  
894 Metabolic Innovations During Host–Virus Interactions in the Ocean.  
895 *Trends in Microbiology* **24**:821–832. doi:10.1016/j.tim.2016.06.006

- 896 Roux S, Brum JR, Dutilh BE, Sunagawa S, Duhaime MB, Loy A, Poulos BT,  
897 Solonenko N, Lara E, Poulain J, Pesant S, Kandels-Lewis S, Dimier C,  
898 Picheral M, Searson S, Cruaud C, Alberti A, Duarte CM, Gasol JM, Vaqué D,  
899 Bork P, Acinas SG, Wincker P, Sullivan MB. 2016. Ecogenomics and  
900 potential biogeochemical impacts of globally abundant ocean viruses.  
901 *Nature* **537**:689–693. doi:10.1038/nature19366
- 902 Sandaa R-A, Dahle H, Brussaard CPD, Ogata H, Blanc-Mathieu R. n.d. Algal viruses  
903 belonging to a subgroup within the Mimiviridae family Encyclopedia of  
904 Virology. Bamford, D., M. Zuckerman, Elsevier, Academic.
- 905 Sandaa R-A, E. Storesund J, Olesin E, Lund Paulsen M, Larsen A, Bratbak G, Ray JL.  
906 2018. Seasonality Drives Microbial Community Structure, Shaping both  
907 Eukaryotic and Prokaryotic Host–Viral Relationships in an Arctic Marine  
908 Ecosystem. *Viruses* **10**. doi:10.3390/v10120715
- 909 Sandaa RA, Heldal M, Castberg T, Thyrhaug R, Bratbak G. 2001. Isolation and  
910 characterization of two viruses with large genome size infecting  
911 *Chrysochromulina ericina* (Prymnesiophyceae) and *Pyramimonas*  
912 *orientalis* (Prasinophyceae). *Virology* **290**:272–280.  
913 doi:10.1006/viro.2001.1161
- 914 Schulz F, Roux S, Paez-Espino D, Jungbluth S, Walsh D, Denev VJ, McMahon KD,  
915 Konstantinidis KT, Eloë-Fadrosh EA, Kyrpides N, Woyke T. 2020. Giant  
916 virus diversity and host interactions through global metagenomics.  
917 *Nature* 1–7. doi:10.1038/s41586-020-1957-x
- 918 Schulz F, Yutin N, Ivanova NN, Ortega DR, Lee TK, Vierheilig J, Daims H, Horn M,  
919 Wagner M, Jensen GJ, Kyrpides NC, Koonin EV, Woyke T. 2017. Giant  
920 viruses with an expanded complement of translation system components.  
921 *Science* **356**:82–85. doi:10.1126/science.aal4657
- 922 Schvarcz CR, Steward GF. 2018. A giant virus infecting green algae encodes key  
923 fermentation genes. *Virology* **518**:423–433.  
924 doi:10.1016/j.virol.2018.03.010
- 925 Suttle CA, Chan AM. 1993. Marine cyanophages infecting oceanic and coastal  
926 strains of *Synechococcus*: abundance, morphology, cross-infectivity and  
927 growth characteristics. *Marine ecology progress series*.  
928 doi:10.3354/meps092099
- 929 Tatusov RL, Galperin MY, Natale DA, Koonin EV. 2000. The COG database: a tool  
930 for genome-scale analysis of protein functions and evolution. *Nucleic*  
931 *Acids Res* **28**:33–36.
- 932 Thompson LR, Zeng Q, Kelly L, Huang KH, Singer AU, Stubbe J, Chisholm SW.  
933 2011. Phage auxiliary metabolic genes and the redirection of  
934 cyanobacterial host carbon metabolism. *Proc Natl Acad Sci USA*  
935 **108**:E757-764. doi:10.1073/pnas.1102164108
- 936 Thomsen HA, Buck KR, Chavez FP. 1994. Haptophytes as components of marine  
937 phytoplankton. *DTU Research Database* 187–208.
- 938 Vardi A, Van Mooy BAS, Fredricks HF, Pendorf KJ, Ossolinski JE, Haramaty L,  
939 Bidle KD. 2009. Viral glycosphingolipids induce lytic infection and cell  
940 death in marine phytoplankton. *Science* **326**:861–865.  
941 doi:10.1126/science.1177322
- 942 Wagstaff BA, Vladu IC, Barclay JE, Schroeder DC, Malin G, Field RA. 2017.  
943 Isolation and Characterization of a Double Stranded DNA Megavirus

- 944            Infecting the Toxin-Producing Haptophyte *Prymnesium parvum*. *Viruses*  
945            **9**. doi:10.3390/v9030040
- 946 Walker BJ, Abeel T, Shea T, Priest M, Abouelliel A, Sakthikumar S, Cuomo CA,  
947            Zeng Q, Wortman J, Young SK, Earl AM. 2014. Pilon: An Integrated Tool for  
948            Comprehensive Microbial Variant Detection and Genome Assembly  
949            Improvement. *PLoS ONE* **9**:e112963. doi:10.1371/journal.pone.0112963
- 950 Wilson WH, Schroeder DC, Allen MJ, Holden MTG, Parkhill J, Barrell BG, Churcher  
951            C, Hamlin N, Mungall K, Norbertczak H, Quail MA, Price C, Rabbinowitsch  
952            E, Walker D, Craigon M, Roy D, Ghazal P. 2005. Complete Genome  
953            Sequence and Lytic Phase Transcription Profile of a Coccolithovirus.  
954            *Science* **309**:1090–1092. doi:10.1126/science.1113109
- 955 Wolf YI, Aravind L, Grishin NV, Koonin EV. 1999. Evolution of Aminoacyl-tRNA  
956            Synthetases—Analysis of Unique Domain Architectures and Phylogenetic  
957            Trees Reveals a Complex History of Horizontal Gene Transfer Events.  
958            *Genome Res* **9**:689–710. doi:10.1101/gr.9.8.689
- 959 Woolhouse MEJ, Taylor LH, Haydon DT. 2001. Population Biology of Multihost  
960            Pathogens. *Science* **292**:1109–1112. doi:10.1126/science.1059026
- 961 Yan X, Chipman PR, Castberg T, Bratbak G, Baker TS. 2005. The Marine Algal  
962            Virus PpV01 Has an Icosahedral Capsid with T=219 Quasisymmetry. *J*  
963            *Virol* **79**:9236–9243. doi:10.1128/JVI.79.14.9236-9243.2005
- 964 Yan X, Yu Z, Zhang P, Battisti AJ, Chipman PR, Bajaj C, Bergoin M, Rossmann MG,  
965            Baker TS. 2009. The Capsid Proteins of a Large, Icosahedral dsDNA Virus.  
966            *J Mol Biol* **385**:1287–1299. doi:10.1016/j.jmb.2008.11.002
- 967 Yoshikawa G, Askora A, Blanc-Mathieu R, Kawasaki T, Li Y, Nakano M, Ogata H,  
968            Yamada T. 2018. Xanthomonas citri jumbo phage XacN1 exhibits a wide  
969            host range and high complement of tRNA genes. *Sci Rep* **8**:4486.  
970            doi:10.1038/s41598-018-22239-3
- 971 Zhang H, Yohe T, Huang L, Entwistle S, Wu P, Yang Z, Busk PK, Xu Y, Yin Y. 2018.  
972            dbCAN2: a meta server for automated carbohydrate-active enzyme  
973            annotation. *Nucleic Acids Res* **46**:W95–W101. doi:10.1093/nar/gky418
- 974 Zimmerman AE, Bachy C, Ma X, Roux S, Jang HB, Sullivan MB, Waldbauer JR,  
975            Worden AZ. 2019. Closely related viruses of the marine picoeukaryotic  
976            alga *Ostreococcus lucimarinus* exhibit different ecological strategies.  
977            *Environ Microbiol* **21**:2148–2170. doi:10.1111/1462-2920.14608  
978  
979

980

## 981 **Appendix 1**

982

|      |                                                                                                     |           |
|------|-----------------------------------------------------------------------------------------------------|-----------|
| 983  | <b>Materials and Methods</b> .....                                                                  | <b>37</b> |
| 984  | <b>Culturing and infection</b> .....                                                                | <b>37</b> |
| 985  | <b>Infectious progeny</b> .....                                                                     | <b>37</b> |
| 986  | <b>Sensitivity to chloroform</b> .....                                                              | <b>37</b> |
| 987  | <b>Cryo-electron tomography</b> .....                                                               | <b>38</b> |
| 988  | <b>Purification of viral particles and DNA isolation</b> .....                                      | <b>38</b> |
| 989  | <b>Genome assembly</b> .....                                                                        | <b>38</b> |
| 990  | <b>Phylogenetic analyses</b> .....                                                                  | <b>39</b> |
| 991  | Five core genes, SDHA, and SDHB .....                                                               | 39        |
| 992  | Rpb2, IleRS, and AsnRS .....                                                                        | 39        |
| 993  | <b>Gene prediction and functional and taxonomic annotation</b> .....                                | <b>40</b> |
| 994  | <b>Taxonomic and functional analysis of <i>vSDHA</i> homologs in OM-RGCv1</b> .....                 | <b>40</b> |
| 995  | <b>PCR and RT-PCR optimization</b> .....                                                            | <b>40</b> |
| 996  | <b>PCR amplification and RT-PCR analysis of <i>vSDHA</i></b> .....                                  | <b>41</b> |
| 997  | <b>Results</b> .....                                                                                | <b>41</b> |
| 998  | <b>DNA repair enzymes</b> .....                                                                     | <b>41</b> |
| 999  | <b>Transcription</b> .....                                                                          | <b>42</b> |
| 1000 | <b>Translation</b> .....                                                                            | <b>42</b> |
| 1001 | <b>Other carbohydrate-active enzymes</b> .....                                                      | <b>43</b> |
| 1002 | <b>Supplementary figures</b> .....                                                                  | <b>44</b> |
| 1003 | <b>Fig. S1. Reduction of PkV RF01 infectivity with chloroform.</b> .....                            | <b>44</b> |
| 1004 | <b>Fig. S2. COG functional distribution of 339 proteins encoded by PkV RF01.</b> .....              | <b>44</b> |
| 1005 | <b>Fig. S3. Comparative COG functional distribution among <i>Mimiviridae</i> members.</b> ....      | <b>45</b> |
| 1006 | <b>Fig. S4. PCR optimization and confirmation of the <i>SDHA</i> gene in the PkV RF01</b>           |           |
| 1007 | <b>genome</b> .....                                                                                 | <b>46</b> |
| 1008 | <b>Fig. S5. PCR and RT-PCR optimization using an internal control gene (<i>mcp</i>).</b> .....      | <b>47</b> |
| 1009 | <b>Fig. S6. Comparative distribution of glycosyltransferase domains among viruses.</b> ....         | <b>48</b> |
| 1010 | <b>Supplementary tables</b> .....                                                                   | <b>49</b> |
| 1011 | <b>Table S1. Type and position of 40 predicted tRNA genes in the PkV RF01 genome.</b> ..            | <b>49</b> |
| 1012 | <b>Table S2. Genes related to lipid metabolism</b> .....                                            | <b>50</b> |
| 1013 | <b>Table S3. Details of tree reconstruction using PhyloBayes</b> .....                              | <b>50</b> |
| 1014 | <b>Table S4. Forward and reverse PCR primers for amplification of <i>vSDHA</i> and <i>MCP50</i></b> |           |
| 1015 | <b>References</b> .....                                                                             | <b>51</b> |
| 1016 |                                                                                                     |           |

## 1017 **Materials and Methods**

### 1018 **Culturing and infection**

1019 All algal host cultures were grown in liquid IMR/2 medium consisting of 70% aged  
1020 seawater, 30% distilled water (25 PSU), and additional selenite (10 nM final  
1021 concentration). The cultures were kept at 14°C and partially synchronized using a  
1022 14:10 h light: dark cycle with irradiance of 100  $\mu\text{mol photons m}^{-2} \text{ s}^{-2}$  supplied by  
1023 white fluorescent tubes. Viruses were produced by adding freshly produced viral  
1024 lysate (ca.  $2 \times 10^8$  VLP/mL), propagated three time on the host before added to  
1025 exponentially growing host cultures (ca.  $5 \times 10^5$  cells/mL) in a ratio of 1:10 volume.  
1026 Infection was followed by flow cytometry (FCM) (Brussaard, 2004; Marie et al.,  
1027 1999) for 72 h by counting viral particles and host cells, as described in Johannessen  
1028 et al., (2015). Burst size was calculated as the number of viral particles released from  
1029 each host cell, estimated from the total number of host cells pre-infection and the total  
1030 number of VLPs produced during the infection cycle (Johannessen et al., 2015).

### 1031 **Infectious progeny**

1032 The percentage of viral infectious progeny was determined by comparing the most  
1033 probable number (MPN; endpoint dilution (Brussaard, 2004)) and flow cytometric  
1034 total counts of viral particles produced during infection. The number of infectious  
1035 particles released in a burst was determined based on the percentage of viral  
1036 infectivity produced during the infection cycle and the burst size. Infectivity was  
1037 tested using *Haptolina ericina* UiO028 as a host, and also compared with two other  
1038 prymnesioviruses, HeV RF02 and PkV RF02 (Johannessen et al., 2015), propagated  
1039 on He UiO028 and *Prymnesium kappa* RCC3423, respectively.

1040  
1041 Briefly, 10 $\times$  dilution were prepared from fresh viral lysate and added to exponentially  
1042 growing host cells in 96-well microtiter plates (eight replicates for each dilution). The  
1043 plates were incubated for 7 days under normal incubation conditions. Cell lysis was  
1044 measured by monitoring *in situ* fluorescence on a plate reader (PerkinElmer  
1045 EnSpire™ 2300 Multilabel Reader) at 460/680 nm. Numbers of infectious particles  
1046 were estimated from the proportion of lysed wells using the MPN\_ver4.xls excel  
1047 spreadsheet from (Jarvis et al., 2010).

### 1048 **Sensitivity to chloroform**

1049 The effect of chloroform on infectivity, used to infer the presence of a lipid membrane  
1050 or lipid molecules in the capsid, was tested by adding 50% (v/v) chloroform to PkV  
1051 RF01 lysate. After mixing, the chloroform phase was separated from the solution by  
1052 centrifugation at 4,000 g for 5 min. The tubes were incubated at 37°C for 2 h with the  
1053 lids open to allow evaporation of any remaining chloroform.

1054  
1055 Triplicates of exponentially growing He UiO028 cells ( $1.6 \times 10^5$  cells /mL) were  
1056 incubated with 1:10 volumes of chloroform-treated viruses (ca.  $2 \times 10^8$  VLP/mL).  
1057 The incubation was followed for 7 days by counting host cells by FCM (Brussaard,  
1058 2004). Host cells in chloroform-treated or untreated medium at the same ratio used  
1059 with the viral lysate were used as controls. Virus propagation was confirmed in lysed  
1060 cultures by FCM.

## 1061 **Cryo-electron tomography**

1062 A small drop of concentrated PkV RF01 (8x10<sup>9</sup>) was deposited on a glow-discharged,  
1063 200-mesh copper grid with holey carbon film (R2/1 Cu 200, Quantifoil Micro Tools  
1064 GmbH, Germany). The sample was blotted with filter paper and immediately plunge  
1065 frozen in liquid ethane. Grids were transferred under liquid nitrogen to a cryo-transfer  
1066 tomography holder (Fishione Instruments, USA) and inserted in a 200-kV  
1067 transmission electron microscope (Thermo Scientific Talos F200C) equipped with a  
1068 Ceta 16M camera. Tilt series were recorded at 45,000× magnification and −7 μm  
1069 defocus between −60° to 60° in 2° increments. Finally, reconstruction, segmentation,  
1070 and visualization of the tomograms was performed with IMOD v4.9 software  
1071 (Kremer et al., 1996).

## 1072 **Purification of viral particles and DNA isolation**

1073 Exponentially growing He UiO028 cultures (2 L) were infected with 20 mL of PkV  
1074 RF01 and inspected visually for lysis. An uninfected culture (100 mL) was used as a  
1075 control. Lysed algal cultures were checked for viruses by FCM counting. Lysed  
1076 cultures were first centrifuged to remove algal debris and some bacteria (5,500 rpm  
1077 for 15 min). Viruses were then pelleted by ultracentrifugation at 25,000 rpm in a  
1078 Beckman Coulter Optima L90K ultracentrifuge for 2 h. The pellets were resuspended  
1079 in SM buffer (0.1 M NaCl, 8 mM MgSO<sub>4</sub>·7H<sub>2</sub>O, 50 mM Tris-HCl, and 0.005%  
1080 glycerin). Viral particles were further purified by Optiprep gradient centrifugation  
1081 (Lawrence and Steward, 2010). Fractions were checked for viruses by FCM and for  
1082 infectivity by infection of He UiO028.

1083  
1084 Isolation of high-quality DNA for sequencing was done by following the protocol of  
1085 (Sandaa et al., 2018) with some modifications. Viral particles were disrupted by one  
1086 round of heating to 90°C for 2 min and then chilling on ice for 2 min. Disodium  
1087 ethylenediaminetetraacetic acid and proteinase K at a final concentration of 20 mM  
1088 and 100 μg mL<sup>-1</sup>, respectively, were then added before incubation of the samples for  
1089 10 min at 55°C. Sodium dodecyl sulfate at a final concentration of 0.5% (w/v) was  
1090 subsequently added, and samples were incubated for an additional 1 h at 55°C.  
1091 Double-stranded DNA was then purified from the lysates using a Zymo Genomic  
1092 DNA Clean & Concentrator Kit-10 (Zymo Research, Irvine, CA, USA) according to  
1093 the manufacturer's protocols. To avoid shearing DNA, gentle pipetting and mixing  
1094 (accomplished by turning the tubes instead of vortexing) were performed in all steps.

## 1095 **Genome assembly**

1096 Isolated DNA from PkV RF01 was subjected to Illumina TruSeq PCR-free library  
1097 preparation (insert size 350 bp). The generated library was sequenced on an Illumina  
1098 MiSeq instrument in paired-end mode (2 × 300 bp) to yield approximately 1.9 million  
1099 reads, which corresponds to about 400× coverage. Reads were assembled into 2,498  
1100 contigs of 500 bp or more with a total assembly size of 4.75 Mb using Newbler  
1101 (Margulies et al., 2005). In addition, a ligation-based 1D<sup>2</sup> nanopore library (LSK-308)  
1102 was constructed and sequenced using an Oxford Nanopore MinION Mk1b device and  
1103 a FLO-MIN107 flow cell, which resulted in 825 long reads with an N50 of 13.6 kb  
1104 and a total of 9.89 Mb. To improve the assembly, short-read contigs were manually  
1105 bridged with the long reads. Manual assembly using Consed (Gordon and Green,  
1106 2013) yielded a linear genome sequence of 1.4 Mb with inverted terminal repeats.  
1107 After assembly, the consensus was polished using Nanopolish (Loman et al., 2015)  
1108 and Pilon (Walker et al., 2014).

## 1109 **Phylogenetic analyses**

### 1110 **Five core genes, SDHA, and SDHB**

1111 The phylogenetic position of PkV RF01 was inferred from concatenated protein  
1112 alignments of five core nucleocytoplasmic virus orthologous genes (NCVOGs) (Yutin  
1113 et al., 2009): D5-like helicase-primase (NCVOG0023), DNA polymerase elongation  
1114 subunit family B (NCVOG0038), DNA or RNA helicases of superfamily II  
1115 (NCVOG0076), packaging ATPase (NCVOG0249), and Poxvirus Late Transcription  
1116 Factor VLTF3-like (NCVOG0262). Sequences were obtained from the NCVOG  
1117 database (<ftp.ncbi.nlm.nih.gov/pub/wolf/COGs/NCVOG/>) (Yutin et al., 2014).  
1118 Additional sequences were obtained from genomes retrieved from GenBank and  
1119 annotated with HMMER v3.12b using the `hmmsearch` (Eddy, 2011) command with  
1120 hidden Markov models available in Schults et al. (2017) (Schulz et al., 2017).  
1121 Sequences from each NCVOG were aligned independently using MAFFT L-INS-i  
1122 (Katoh and Standley, 2013). The alignments were trimmed with `trimAl v1.2` in  
1123 `gappyout` mode (Capella-Gutiérrez et al., 2009) prior to concatenation using a custom  
1124 Python script. Bayesian phylogenetic trees were inferred with PhyloBayes 1.7  
1125 (Lartillot et al., 2009) using the CAT model and a GTR substitution matrix. Four  
1126 chains were run for 34,500–35,500 generations. The `bpcomp` command was used to  
1127 check for convergence. One chain was discarded, and a consensus tree was  
1128 constructed using the remaining three chains.

1129  
1130 For phylogenetic analyses of succinate dehydrogenase subunits, top hits of PkV RF01  
1131 SDHA and SDHB were retrieved from UniProt (<https://www.uniprot.org/>) using  
1132 online PHMMR searches (<https://www.ebi.ac.uk/Tools/hmmer/search/phmmer>) and  
1133 also from the Tara Oceans project using online BLASTP searches ([http://tara-](http://tara-oceans.mio.osupytheas.fr/ocean-gene-atlas/)  
1134 [oceans.mio.osupytheas.fr/ocean-gene-atlas/](http://tara-oceans.mio.osupytheas.fr/ocean-gene-atlas/)) (Villar et al., 2018). Alignments  
1135 generated with MAFFT L-INS-i were filtered with `trimAl` in `gappyout` mode.  
1136 Maximum-likelihood phylogenies were inferred with RAxML 8.2.9 (Stamatakis,  
1137 2014) using the PROTCATALG model and automatic bootstrapping with the  
1138 following options: ‘-N autoMRE -f a -n autoresult’. Phylogenetic trees of PkV RF01,  
1139 SDHA, and SDHB were visualized using iTOL (Letunic and Bork, 2016).  
1140

### 1141 **Rpb2, IleRS, and AsnRS**

1142 To reconstruct a phylogenetic tree based on the second largest RNA polymerase  
1143 subunit, homologs were recruited by comparing Mimivirus Rpb2 against all proteins  
1144 of viruses and selected organisms in the KEGG database using the GenomeNet  
1145 BLASTP tool (<https://www.genome.jp/>). Organisms were manually selected from the  
1146 KEGG list to ensure broad taxonomic coverage of the tree of life. The retrieved amino  
1147 acid sequences were aligned using MAFFT-LINSI (Katoh and Standley, 2013) and  
1148 then trimmed using `trimAl` (Capella-Gutiérrez et al., 2009) with the following  
1149 parameters: ‘-resoverlap 0.5 -seqoverlap 70 -gt 0.8 -st 0.001 -cons 50’. The tree was  
1150 reconstructed using FastTree (Price et al., 2009) as implemented in the GenomeNet  
1151 TREE tool (<https://www.genome.jp/tools-bin/ete>). Isoleucine tRNA synthase and  
1152 aspartyl tRNA synthetase viral and cellular homologs were retrieved and aligned in  
1153 the same way. Trees were searched using PhyloBayes MPI (Lartillot et al., 2013) with  
1154 the non-homogeneous CAT+GTR model (Lartillot and Philippe, 2004). Details of the  
1155 PhyloBayes runs for each tree are provided in Table S3.

## 1156 **Gene prediction and functional and taxonomic annotation**

1157 GeneMarkS with the option ‘virus’ (Besemer et al., 2001) predicted 1,121 open  
1158 reading frames (ORFs) in the fully assembled genome sequence of PkV RF01, while  
1159 tRNAscan-SE (Lowe and Chan, 2016) predicted 41 tRNAs. PkV RF01 CDS amino  
1160 acid sequences were searched against Virus-Host DB (Mihara et al., 2016), RefSeq  
1161 (Pruitt et al., 2007), UniRef90 (Suzek et al., 2015), and COG (Tatusov et al., 2000)  
1162 databases using BLASTP with an  $E$ -value of  $1 \times 10^{-5}$  as the significant similarity  
1163 threshold and against the Conserved Domain Database (Marchler-Bauer et al., 2015)  
1164 using RPS-BLAST with an  $E$ -value threshold of  $1 \times 10^{-2}$ . The 10 best hits for each  
1165 database were compiled in a single file and manually inspected to transfer annotations  
1166 of subject sequences to our query. In ambiguous cases, such as distant homologs  
1167 (often seen in viral genomes) or unclear or contradictory annotations of subject  
1168 sequences, the query was searched against KEGG genes (Kanehisa et al., 2016) to  
1169 allow extensive manual checking using GenomeNet tools (<https://www.genome.jp/>;  
1170 alignment quality, length comparison to canonical genes, and links with KEGG  
1171 orthology). We automatically annotated glycosyltransferases (GTs) and other  
1172 carbohydrate-active enzymes (glycoside hydrolases, GHs; polysaccharide lyases, PLs;  
1173 carbohydrate esterases, CEs; and auxiliary activities, AAs) in PkV RF01 and all viral  
1174 genomes in Virus-Host DB (as of June 2018) using the *hmm* option of the dbCAN2  
1175 pipeline and its profile database (Zhang et al., 2018). We retained hits with  $E$ -values  $<$   
1176  $1 \times 10^{-5}$  and domain coverage  $>$  35%, which corresponded to default settings.  
1177 Sequence-based identification of paralogous genes in the PkV RF01 proteome was  
1178 conducted using OrthoFinder (Emms and Kelly, 2015) with default parameters.

## 1179 **Taxonomic and functional analysis of vSDHA homologs in OM-RGCv1**

1180 We searched PkV RF01 SDHA and SDHB against OM-RGCv1 (Sunagawa et al.,  
1181 2015) using the Ocean Gene Atlas (Villar et al., 2018) BLAST-based tool and kept  
1182 the top 50 hits with significant  $E$ -values for further analysis. We then collected  
1183 genome fragments (contigs) encoding these 50 SDHAs and 50 SDHBs by searching  
1184 via BLASTN for identical hits over full *SDHA* or *SDHB* lengths against *Tara* ocean  
1185 assemblies (downloaded from EBI) used to construct OM-RGCv1 (Sunagawa et al.,  
1186 2015). We predicted ORFs in these genome fragments using GeneMarkS. The  
1187 resulting 1,113 amino acid sequences were functionally annotated by searching  
1188 against Pfam protein families (El-Gebali et al., 2019) using profile HMM scan (Eddy,  
1189 1998) and also taxonomically using a last common ancestor strategy as in (Carradec  
1190 et al., 2018); in brief, protein sequences were searched against a database composed  
1191 of UniRef cells, MMETSP (Keeling et al., 2014) and Virus-Host DB (Mihara et al.,  
1192 2016) data using DIAMOND (Buchfink et al., 2015). Selected hits were then used to  
1193 derive the last common ancestor of the query using a NCBI taxonomic tree re-wired  
1194 to reflect the taxonomy of NCLDVs.

## 1195 **PCR and RT-PCR optimization**

1196 We designed specific primers (Table S4) targeting a 256-bp region of the *mcp* gene to  
1197 use both as an internal control in the RT-PCR and to confirm that our protocols were  
1198 optimized. For each PCR, a negative control (sterile distilled H<sub>2</sub>O) was included. PCR  
1199 amplifications were carried out in 50- $\mu$ L total volumes containing 1  $\mu$ L of template  
1200 using a DNA HotStarTaq Master Mix kit (Qiagen). The cycling protocol was as  
1201 follows: 15 min at 95°C, followed by 35 cycles of 30 s at 94°C, 30 s at 59°C, and 30 s  
1202 at 72°C, with a final extension of 12 min at 72°C.  
1203



1204 RT-PCRs were performed using the SuperScript III One-Step RT-PCR with Platinum  
1205 *Taq* DNA Polymerase system (Thermo Fisher). Cycling conditions were as follows:  
1206 16 min at 55°C and 2 min at 94°C, followed by 40 cycles of 15 s at 94°C, 30 s at  
1207 49°C, and 30 s at 68°C, and a final extension of 5 min at 68°C.

1208  
1209 All PCR products were checked for the correct size on a 1.5% agarose gel stained  
1210 with GelRed (Biotium). PCR products were further checked by sequencing using  
1211 BigDye v3.1 (Thermo Fisher) for cycle sequencing (Sekvenseringslaboratoriet, UiB,  
1212 Norway).

### 1213 **PCR amplification and RT-PCR analysis of *vSDHA***

1214 To investigate whether the *vSDHA* gene is transcribed during infection, an infected  
1215 culture of He\_UiO028 plus PkV RF01 as well as an uninfected He\_UiO028 culture  
1216 (control) were set up as described above. Samples were collected at 24, 72, and 96 h  
1217 post infection from both cultures. RNA was extracted using an RNeasy Plus Universal  
1218 Mini kit (Qiagen), with gDNA removed in an extra step using a TURBO DNA-free  
1219 kit (Ambion).

1220  
1221 Specific primers were designed to target a 150-bp region of the *vSDHA* gene (Table  
1222 S4). For each PCR, two negative controls (sterile distilled H<sub>2</sub>O and extracted DNA  
1223 from He028) were included. As positive controls for the transcription, we used  
1224 primers targeting the *mcp* gene (see above). As a positive PCR control, we used  
1225 genomic PkV RF01 DNA. PCR amplifications were conducted in 50- $\mu$ L total  
1226 volumes containing 1  $\mu$ L of template DNA using an ExTaq kit (Takara). The cycling  
1227 protocol was as follows: 5 min at 94°C, followed by 35 cycles of 30 s at 94°C, 30 s at  
1228 59°C, and 30 s at 72°C, with a final extension of 12 min extension at 72°C.

1229  
1230 RT-PCRs were performed using a SuperScript III One-Step RT-PCR with Platinum  
1231 *Taq* DNA Polymerase system (Thermo Fisher). Cycling conditions were as follows:  
1232 16 min at 55°C and 2 min at 94°C, followed by 40 cycles of 15 s at 94°C, 30 s at  
1233 49°C, and 30 s at 68°C, with a final extension of 5 min at 68°C. PCR products were  
1234 checked as described above.

## 1235 **Results**

### 1236 **DNA repair enzymes**

1237 NCLDV members are known to encode several genes corresponding to major DNA  
1238 repair pathways, with some members encompassing full, or nearly full, pathway  
1239 representation, such as the base excision repair (BER) pathway of Mimivirus  
1240 (Redrejo-Rodríguez and Salas, 2014). While some of these genes were acquired  
1241 relatively recently from cellular organisms, others are connected with the early  
1242 evolutionary history of these viruses (Blanc-Mathieu and Ogata, 2016). PkV RF01  
1243 also encodes a set of enzymes needed to facilitate the BER pathway, namely, two  
1244 DNA glycosylases (ORF 196 and ORF 871), an apurinic-apyrimidinic (AP)  
1245 endonuclease (ORF 935), a family-X DNA polymerase (ORF 630), and a NAD-  
1246 dependent DNA ligase (ORF 741). These enzymes are conserved in all *Mimiviridae*  
1247 members except for those with relatively small genomes (PgV, CeV, and AaV). In  
1248 PgV and CeV, but not AaV and PkV RF01, the family-X DNA polymerase and DNA  
1249 ligase are fused. The presence of these BER enzymes in PkV RF01 suggests that this

1250 viral BER pathway was already present in the last common ancestor of *Mimiviridae*.  
1251 As in all other *Mimiviridae*, PkV RF01 encodes MutS7, a key enzyme of the  
1252 mismatch repair pathway, and the MutS8 homolog—thus far only observed in PgV  
1253 and CeV. Enzymes involved in other DNA repair pathways, such as XPG/Rad2  
1254 endonuclease (present in *Mimivirus* and CroV) and the fused Mre11-Rad50 DNA  
1255 break repair protein (present in *Mimivirus* members only), were not found in PkV  
1256 RF01.

### 1257 **Transcription**

1258 Similar to other *Mimiviridae*, PkV RF01 encodes several transcription-related genes,  
1259 including those coding for several subunits of eukaryotic DNA-dependent RNA  
1260 polymerase type II (RPB1, RPB2 [ $\times 2$ ], RPB3, RPB5, RPB6, RPB7, RPB9, and  
1261 RPB10, the latter not present in other *Mimiviridae* besides BsV and HKV1);  
1262 transcription initiation (ORF306), elongation (ORF856), late (ORF436), and  
1263 termination (ORF275) factors; a TATA-box-like binding protein (ORF709); and a  
1264 mRNA capping enzyme (ORF42)—but not the polyA polymerase seen in other  
1265 *Mimiviridae*. PkV RF01 also encodes a cold-shock protein (ORF 1082) shared with  
1266 CeV and PgV that may prevent the formation of secondary structures in mRNA at  
1267 low temperature and thus facilitate the initiation of translation (Keto-Timonen et al.,  
1268 2016).

### 1269 **Translation**

1270 A striking feature of *Mimiviridae* is the high prevalence of genes coding for  
1271 translation-associated proteins. In particular, amino-acyl tRNA synthetases (aaRSs)  
1272 are found in all heterotroph-infecting *Mimiviridae*—ranging from 1 in CroV to 20 in  
1273 Tupanvirus—but are missing from alga-infecting *Mimiviridae*, although CeV encodes  
1274 a catalytic domain for Asn/Asp-RNAt synthetase. In addition to encoding the two  
1275 aaRSs reported in the main text, we found that PkV RF01 encodes a catalytic domain  
1276 for Asn/Asp-RNAt (ORF762) also found in *Prochlorococcus* phages P-SSM2, 5, and  
1277 7. PkV RF01 encodes other translation-related proteins also present in other  
1278 *Mimiviridae*, namely, the translation initiation factor 4F cap binding subunit (eIF-4E;  
1279 ORF 512), the helicase subunit (eIF-4A; ORF 229), and the peptide chain release  
1280 factor 1 (eRF1; ORF 651). The latter protein is not orthologous to chain release  
1281 factors in other *Mimiviridae*, as it exhibits much higher sequence conservation with  
1282 cellular or even *Marseilleviridae* homologs. PkV RF01 shares with PgV the  
1283 translation elongation factor eEF3 (ORF 489), whose sequence in both viral species is  
1284 highly similar to haptophyte homologs. In addition, PkV RF01 encodes the translation  
1285 elongation factor EF-1alpha (ORF946) that is absent in other *Mimiviridae* members  
1286 but present in AaV. EF-1alpha of PkV RF01 was most likely acquired from  
1287 haptophytes, as it has a high amino acid identity (57%) to that of *E. huxleyi*, whereas  
1288 the AaV homolog is most closely related (62% aa identity) to that of diatoms. PkV  
1289 RF01 also encodes the translation initiation factor 1A (EIF1A) (ORF 62) with no  
1290 detectable homolog in viruses ( $E$ -value =  $1 \times 10^{-5}$  in BLASTP searches against the  
1291 Virus-Host DB database). While translation-associated genes may predate the  
1292 divergence of known extant eukaryotic lineages, the above examples demonstrate that  
1293 some other genes were acquired much more recently, consistent with the “accordion  
1294 model” of episodic gain and loss of genes in the evolution of these viruses (Filée,  
1295 2015; Schulz et al., 2017).

1296 **Other carbohydrate-active enzymes**

1297 Other carbohydrate-active enzymes in the PkV RF01 genome include seven glycoside  
1298 hydrolases (GHs), four carbohydrate esterases (CEs), one polysaccharide lyase (PL),  
1299 one carbohydrate-binding module (CBM), and a putative sugar fermentation  
1300 stimulation protein A (ORF 1003) possibly involved in maltose metabolism. These  
1301 numbers are not excessively high compared with other viruses. Other detected ORFs  
1302 were homologous to enzymes involved in carbohydrate transport and metabolism,  
1303 notably a transketolase (ORF 528) involved in the pentose phosphate pathway in all  
1304 organisms and in the Calvin cycle of photosynthetic organisms. Finally, we detected a  
1305 6-phosphofructo-2-kinase/fructose-2,6-biphosphatase 2 (ORF 539) and a mannose-1-  
1306 phosphate guanylyltransferase/mannose-6-phosphate isomerase (ORF 836)  
1307 respectively involved in fructose and mannose metabolism.

1308 **Supplementary figures**

1309

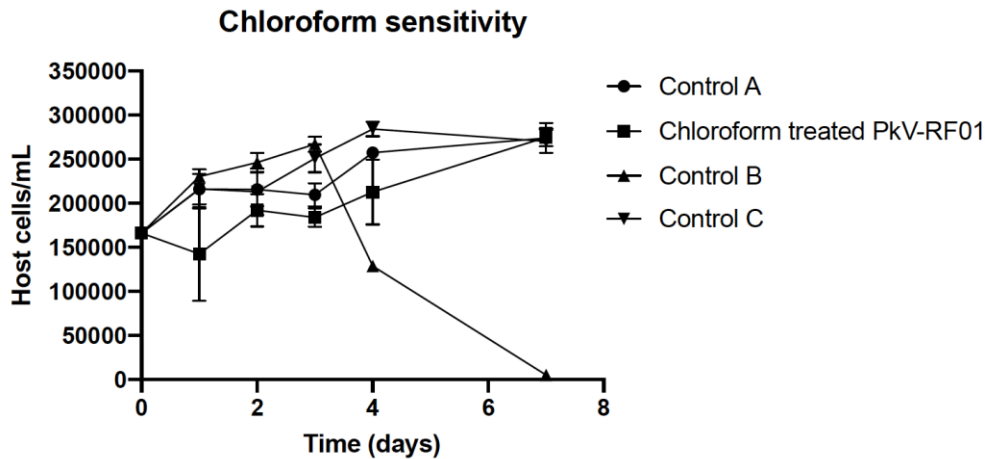

1310

1311 **Fig. S1. Reduction of PkV RF01 infectivity with chloroform.**

1312 Experiments were set up in triplicate, and host cells were counted by flow cytometry.  
 1313 Chloroform-treated PkV RF01 was added to exponentially growing He UiO028 cells  
 1314 in a 1:10 volume ratio. Controls were He UiO028 cells incubated with chloroform-  
 1315 treated medium (Control A), untreated PkV RF01 (Control B), and untreated medium  
 1316 (Control C). SDs are indicated with error bars.

1317

1318

1319

1320

1321

1322

1323

1324

1325

1326

1327

1328

1329

1330

1331

1332

1333

1334

1335

1336

1337

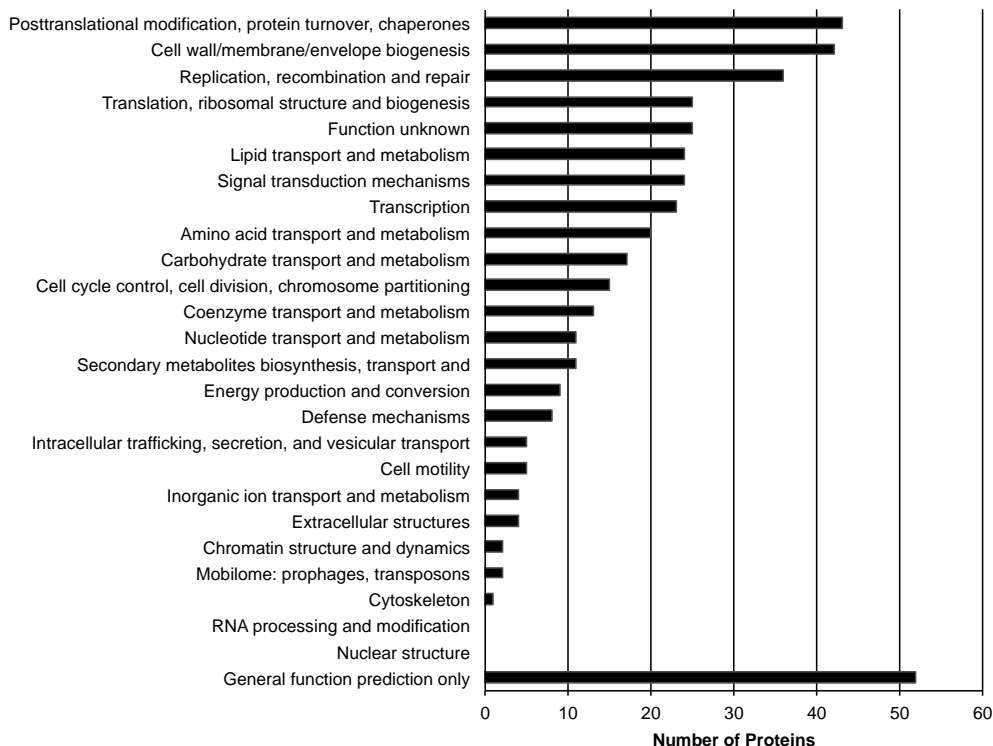

1338 **Fig. S2. COG functional distribution of 339 proteins encoded by PkV**

1339 **RF01.**

1340

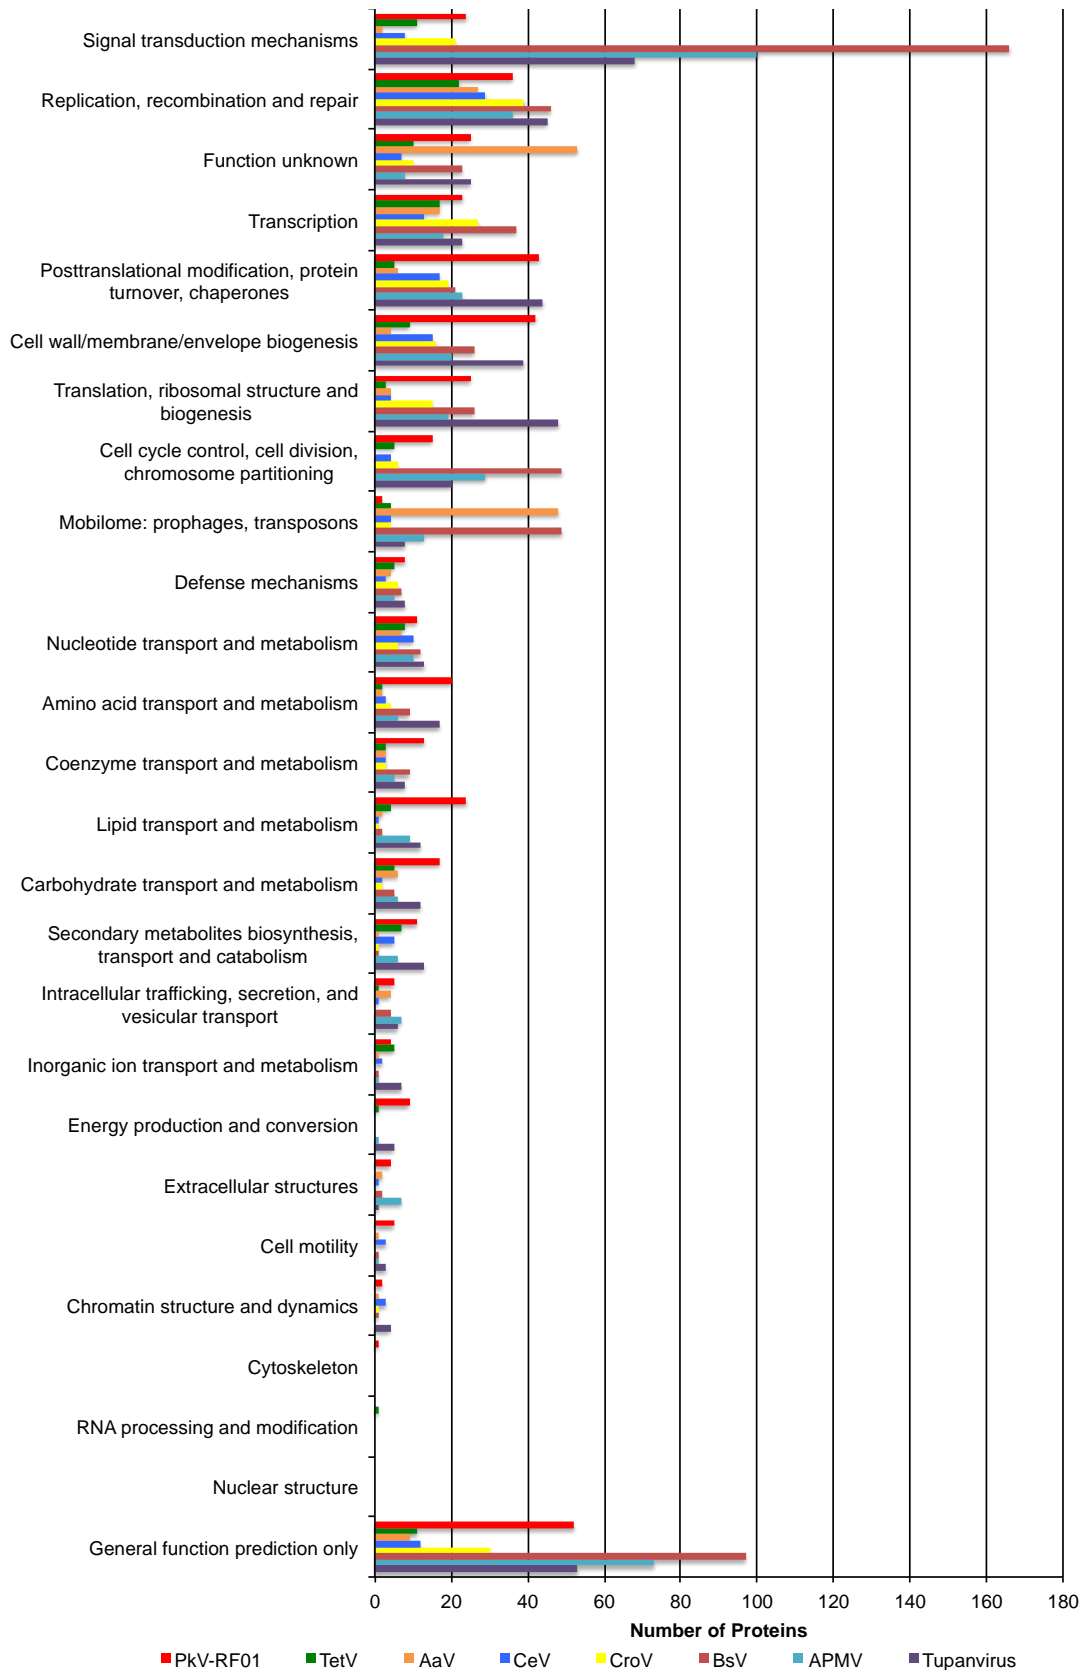

1341

1342 **Fig. S3. Comparative COG functional distribution among *Mimiviridae***  
 1343 **members.**

1344 COG sequences were automatically searched against the proteomes of each virus  
 1345 using BLASTP with an  $E$ -value of  $1 \times 10^{-5}$  as the significant similarity threshold.

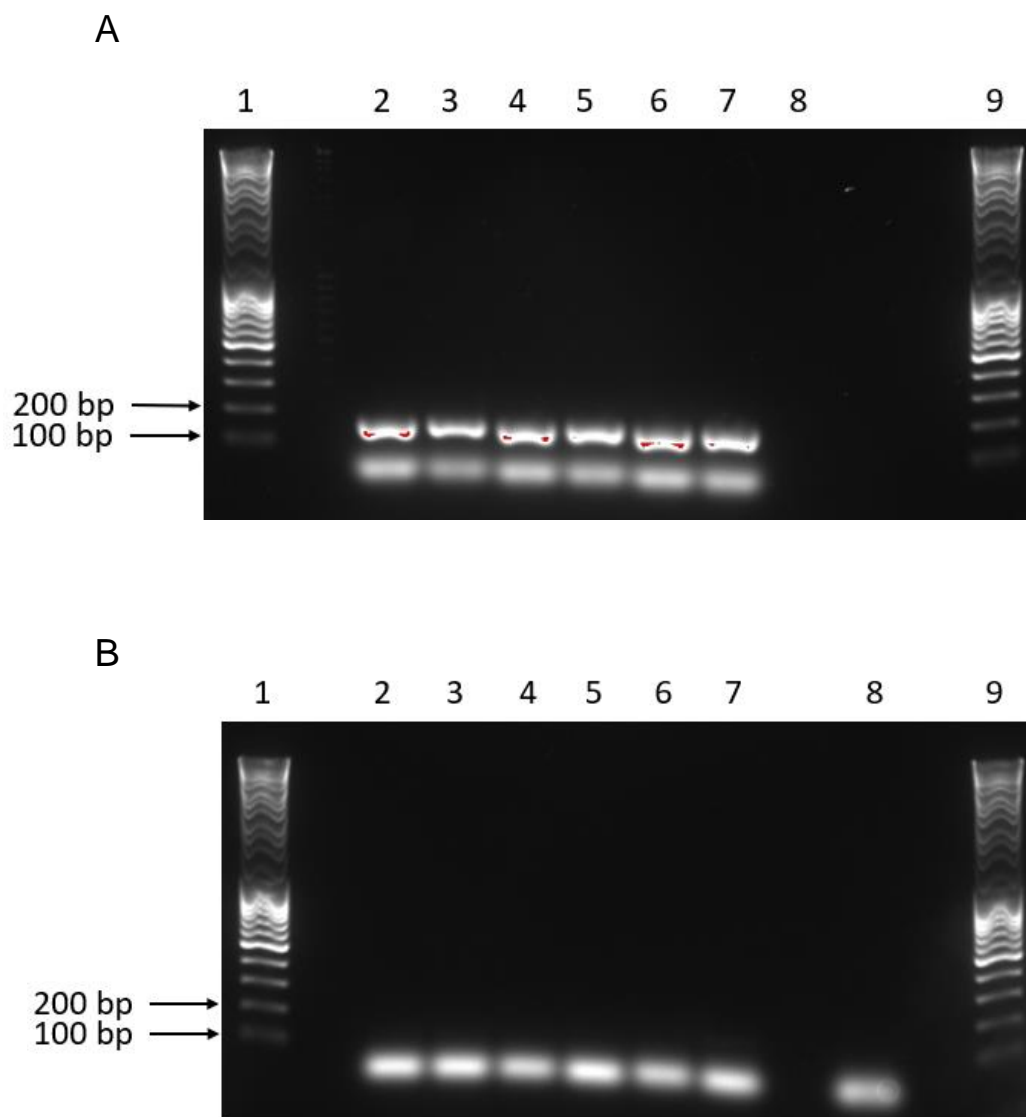

1346

1347 **Fig. S4. PCR optimization and confirmation of the *SDHA* gene in the PkV**  
1348 **RF01 genome.**

1349 (A–B) Results of PCR with *SDHA* primers using genomic PkV RF01 DNA (A) and  
1350 genomic He UiO028 DNA (B) as templates. Lanes 1 and 9, DNA ladder; 2–7,  
1351 optimization of the PCR annealing temperature from 55°C (2) to 60°C (7); 8, negative  
1352 control (sdH<sub>2</sub>O).

1353

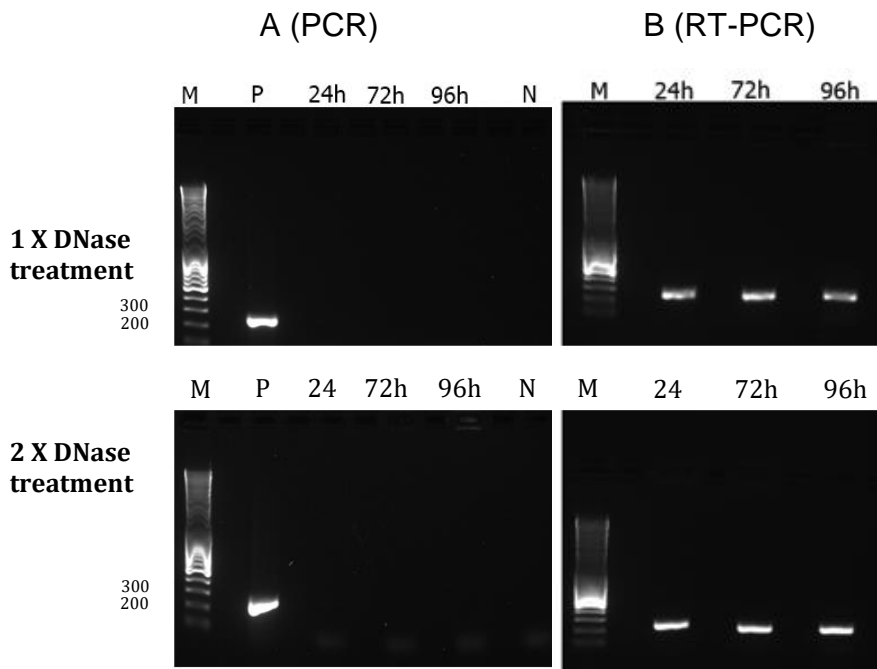

1354 **Fig. S5. PCR and RT-PCR optimization using an internal control gene**  
1355 **(*mcp*).**

1356 PCR and RT-PCR were carried out after removal of genomic DNA using a TURBO  
1357 DNA-free kit. Samples were taken 24, 72, and 96 h after infection. Two different  
1358 protocols, both provided in the TURBO DNA-free kit manual, were used to optimize  
1359 the reactions. (A) PCR check for the presence of genomic DNA after RNA isolation  
1360 and DNase treatments P, positive control (PkV RF01 genomic DNA); N, negative  
1361 control (sdH<sub>2</sub>O). (B) Result of RT-PCR of samples harvested 24, 72 and 96 h post  
1362 infection. M, DNA marker (MassRuler DNA Ladder Mix, Thermo Fisher, 80 to  
1363 10,000 bp).

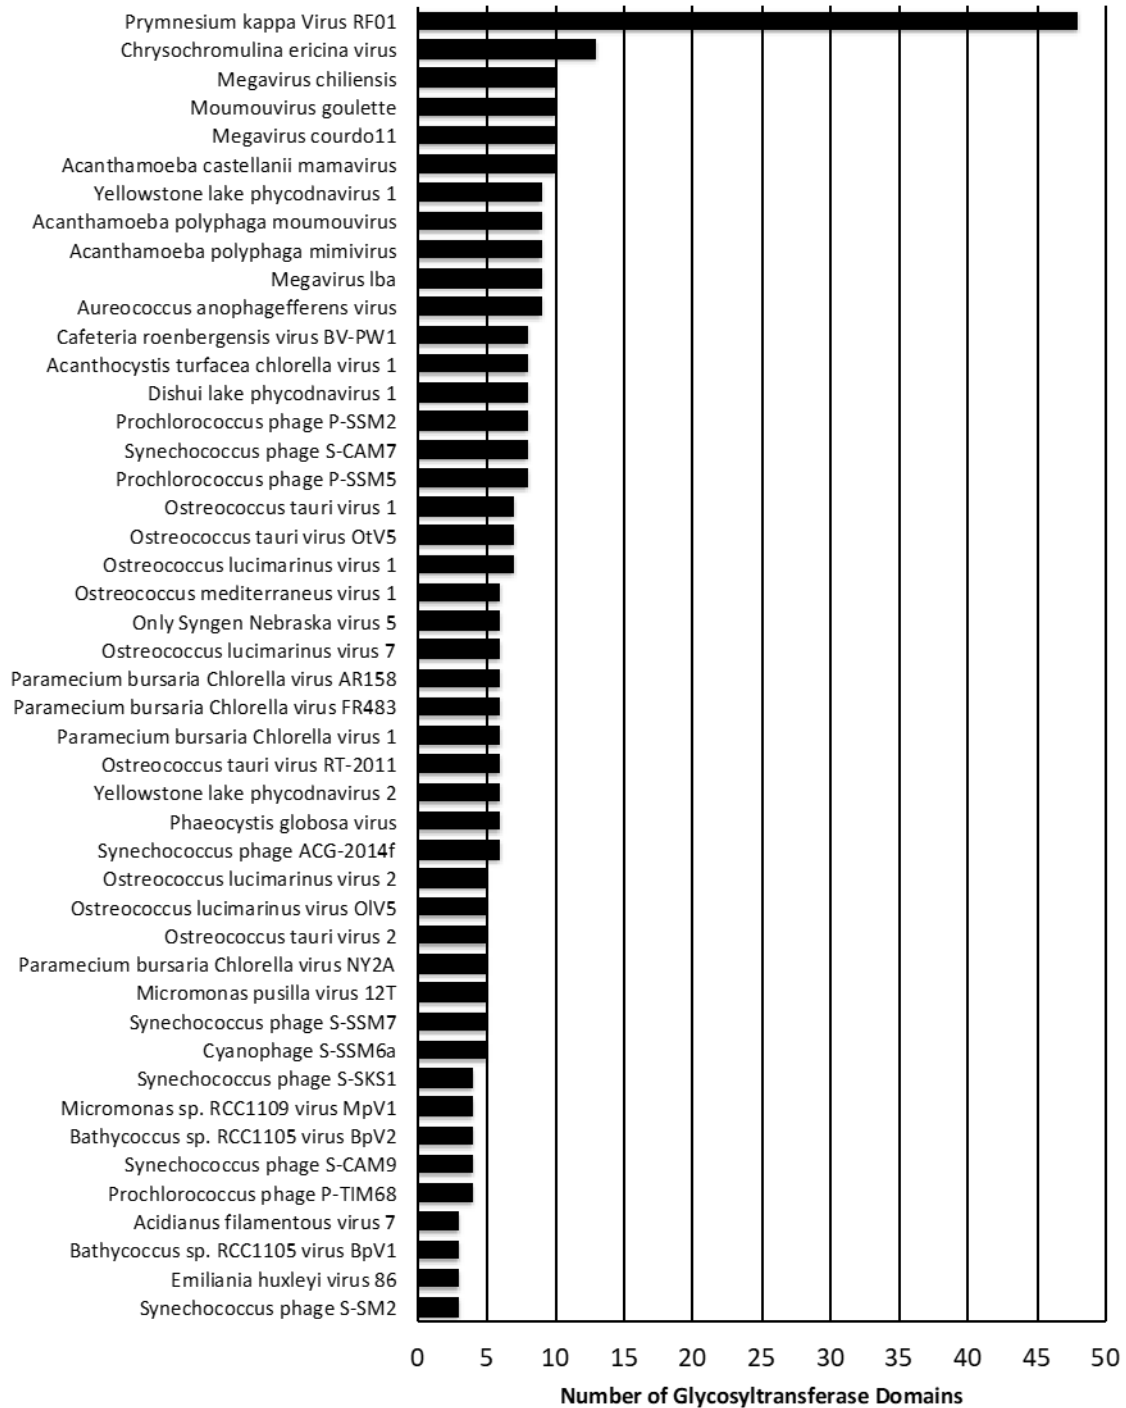

1364

1365 **Fig. S6. Comparative distribution of glycosyltransferase domains among**  
1366 **viruses.**



1367 **Supplementary tables**

1368 **Table S1. Type and position of 40 predicted tRNA genes in the PkV RF01**  
 1369 **genome**

1370

| Anti codon | Begin   | End     | Strand |
|------------|---------|---------|--------|
| CAT        | 3556    | 3483    | -      |
| NNN        | 90515   | 90393   | -      |
| AGT        | 165083  | 165153  | +      |
| TAT        | 165371  | 165444  | +      |
| TAA        | 165508  | 165590  | +      |
| TTT        | 165592  | 165666  | +      |
| TTT        | 165672  | 165744  | +      |
| CAT        | 165763  | 165835  | +      |
| GTT        | 165838  | 165911  | +      |
| TTG        | 166072  | 166144  | +      |
| AAT        | 166165  | 166238  | +      |
| TGT        | 686381  | 686452  | +      |
| GCT        | 787944  | 787863  | -      |
| TGA        | 930076  | 930157  | +      |
| TGC        | 941356  | 941284  | -      |
| TGG        | 956727  | 956656  | -      |
| TCC        | 956801  | 956731  | -      |
| AAT        | 1342428 | 1342564 | +      |
| CAA        | 1388099 | 1388180 | +      |
| CAT        | 1388185 | 1388257 | +      |
| GTT        | 1388263 | 1388336 | +      |
| TTG        | 1388494 | 1388565 | +      |
| CTT        | 1388664 | 1388736 | +      |
| CTT        | 1388946 | 1389018 | +      |
| TCT        | 1389231 | 1389303 | +      |
| TCT        | 1389516 | 1389588 | +      |
| TCT        | 1389801 | 1389873 | +      |
| CTT        | 1390089 | 1390163 | +      |
| TCT        | 1393421 | 1393493 | +      |
| TTC        | 1393523 | 1393594 | +      |
| CAA        | 1393697 | 1393778 | +      |
| TAT        | 1393782 | 1393855 | +      |
| TAA        | 1393963 | 1394044 | +      |
| TAT        | 1394048 | 1394121 | +      |
| TAA        | 1394229 | 1394310 | +      |
| TAT        | 1394314 | 1394387 | +      |
| TAA        | 1394495 | 1394576 | +      |
| TAT        | 1394580 | 1394653 | +      |
| TAA        | 1394761 | 1394841 | +      |
| CAT        | 1417619 | 1417692 | +      |

1371

1372

1373 The distribution of tRNA types is as follows: tRNA<sup>Ile</sup> and tRNA<sup>Leu</sup>, seven each;  
 1374 tRNA<sup>Lys</sup>, five; tRNA<sup>Arg</sup> and tRNA<sup>Met</sup>, four each; tRNA<sup>Asn</sup>, tRNA<sup>Gln</sup>, tRNA<sup>Ser</sup>, and  
 1375 tRNA<sup>Thr</sup>, two each; and tRNA<sup>Ala</sup>, tRNA<sup>Glu</sup>, tRNA<sup>Gly</sup>, tRNA<sup>Pro</sup>, and  
 1376 undetermined, one each.

1377 **Table S2. Genes related to lipid metabolism**

1378

| ORF      | Length (aa) | Annotation                                                                   | KEGG orthology     | Pathway                                                |
|----------|-------------|------------------------------------------------------------------------------|--------------------|--------------------------------------------------------|
| ORF 30   | 276         | 2,4-dienoyl-CoA reductase, mitochondrial [EC:1.3.1.34]                       | K13236             | Beta oxidation                                         |
| ORF 33   | 888         | Putative CoA-transferase                                                     | no significant hit | Beta oxidation                                         |
| ORF 121  | 225         | glycerophosphoryl diester phosphodiesterase                                  | K01126             | Glycerophospholipids metabolisms                       |
| ORF 138  | 2116        | Fatty acid synthase (FASN)                                                   | K00665             | Fatty acid biosynthesis                                |
| ORF 142  | 523         | Long-chain-fatty-acid-CoA ligase ACSBG [EC:6.2.1.3]                          | K15013             | Fatty acid degradation / biosynthesis / Beta Oxidation |
| ORF 175  | 1303        | Acetyl-CoA carboxylase / biotin carboxylase 1 [EC:6.4.1.2.6.3.4.14.2.1.3.15] | K11262             | Fatty acid biosynthesis                                |
| ORF 236  | 410         | Glutaryl-CoA dehydrogenase [EC:1.3.8.6]                                      | K00252             | Fatty acid degradation                                 |
| ORF 293  | 330         | Lysophospholipase like                                                       | no significant hit | not assigned                                           |
| ORF 357  | 313         | Lysophospholipase like                                                       | no significant hit | not assigned                                           |
| ORF 386  | 293         | Triacylglycerol lipase [EC:3.1.1.3]                                          | K01046             | Glycerolipid metabolism                                |
| ORF 481  | 503         | Lipase like                                                                  | no significant hit | not assigned                                           |
| ORF 635  | 282         | Lipase-like                                                                  | no significant hit | not assigned                                           |
| ORF 653  | 292         | Lipase-like                                                                  | no significant hit | not assigned                                           |
| ORF 690  | 260         | Lipase-like                                                                  | no significant hit | not assigned                                           |
| ORF 774  | 327         | Lysophospholipid Acyltransferases [EC:2.3.1.22]                              | K14457             | Glycerolipid metabolism                                |
| ORF 694  | 336         | Lipase esterase (Carbohydrate esterase CE10)                                 | no significant hit | not assigned                                           |
| ORF 695  | 335         | Lipase esterase (Carbohydrate esterase CE10)                                 | no significant hit | not assigned                                           |
| ORF 886  | 516         | Stearoyl-CoA desaturase (Delta-9 desaturase) [EC:1.14.19.1]                  | K00507             | Biosynthesis of unsaturated fatty acids                |
| ORF 902  | 2083        | Fatty acid synthase (FASN)                                                   | K00665             | Fatty acid biosynthesis                                |
| ORF 904  | 678         | Long-chain-fatty-acid-CoA ligase ACSBG [EC:6.2.1.3]                          | K15013             | Fatty acid degradation / biosynthesis / Beta Oxidation |
| ORF 1016 | 422         | Cyclopropane-fatty-acyl-phospholipid synthase [EC:2.1.1.79]                  | k00574             | not assigned                                           |
| ORF 1046 | 652         | Acyl-CoA dehydrogenase                                                       | K06445             | Fatty acid degradation / Beta oxidation                |

\* ORF 138 and ORF 902 share 32% aa identity  
 \*\* ORF 142 and ORF 904 share 22% aa identity  
 \*\*\* ORF 694 and ORF 695 share 92% aa identity

1379

1380

1381 **Table S3. Details of tree reconstruction using PhyloBayes**

1382

| Protein                   | Burn-in                                            | Sub-sampling | Chain | #Trees | Maxdiff   | Meandiff  |
|---------------------------|----------------------------------------------------|--------------|-------|--------|-----------|-----------|
| Five NCLDV-core proteins* | 2000                                               | 2            | 1     | 16,680 | Discarded | Discarded |
|                           |                                                    |              | 3     | 16,725 |           |           |
|                           |                                                    |              | 4     | 16,483 |           |           |
|                           |                                                    |              | 2     | 16,430 |           |           |
| Rpb2                      | Reconstructed using FastTree v2.1 default settings |              |       |        |           |           |
| SDHA                      | Reconstructed using RaxML                          |              |       |        |           |           |
| SDHB                      | Reconstructed using RaxML                          |              |       |        |           |           |
| AsnRS                     | 10,000                                             | 3            | 1     | 15,485 | 0.27      | 0.02      |
|                           |                                                    |              | 2     | 15,066 |           |           |
|                           |                                                    |              | 3     | 15,627 |           |           |
| IleRS                     | 10,000                                             | 3            | 1     | 10,757 | 0.16      | 0.009     |
|                           |                                                    |              | 2     | 10,819 |           |           |
|                           |                                                    |              | 3     | 10,856 |           |           |

1383  
 1384  
 1385  
 1386

\* D5-like helicase-primase (NCVOG0023), DNA polymerase elongation subunit family B (NCVOG0038), DNA or RNA helicases of superfamily II (NCVOG0076), packaging ATPase (NCVOG0249), and Poxvirus Late Transcription Factor VLTF3 like (NCVOG0262).

1387 **Table S4. Forward and reverse PCR primers for amplification of vSDHA and MCP**

1388

1389

| Primer name    | Sequence (5' - 3')    | PCR product (bp) |
|----------------|-----------------------|------------------|
| vSDHA-F1       | ATGTGCCGAGAAGCTCCTAA  | 154              |
| vSDHA-R1       | CTGCACAGGCTGTTTCGATAA |                  |
| PkV-RF01-MCP-F | GATGAACCTTGCCCACT     | 256              |
| PkV-RF01-MCP-F | GTGCATGGTACGTTTTTCGTG |                  |

## 1390 **References**

1391

1392 Besemer J, Lomsadze A, Borodovsky M. 2001. GeneMarkS: a self-training method  
1393 for prediction of gene starts in microbial genomes. Implications for  
1394 finding sequence motifs in regulatory regions. *Nucleic Acids Res* **29**:2607–  
1395 2618.

1396 Blanc-Mathieu R, Ogata H. 2016. DNA repair genes in the Megavirales  
1397 pangenome. *Curr Opin Microbiol*, Environmental microbiology \* Special  
1398 Section: Megaviromes **31**:94–100. doi:10.1016/j.mib.2016.03.011

1399 Brussaard CPD. 2004. Optimization of procedures for counting viruses by flow  
1400 cytometry. *Appl Environ Microbiol* **70**:1506–1513.  
1401 doi:10.1128/aem.70.3.1506-1513.2004

1402 Buchfink B, Xie C, Huson DH. 2015. Fast and sensitive protein alignment using  
1403 DIAMOND. *Nat Methods* **12**:59–60. doi:10.1038/nmeth.3176

1404 Capella-Gutiérrez S, Silla-Martínez JM, Gabaldón T. 2009. trimAl: a tool for  
1405 automated alignment trimming in large-scale phylogenetic analyses.  
1406 *Bioinforma Oxf Engl* **25**:1972–1973. doi:10.1093/bioinformatics/btp348

1407 Carradec Q, Pelletier E, Silva CD, Alberti A, Seeleuthner Y, Blanc-Mathieu R, Lima-  
1408 Mendez G, Rocha F, Tirichine L, Labadie K, Kirilovsky A, Bertrand A,  
1409 Engelen S, Madoui M-A, Méheust R, Poulain J, Romac S, Richter DJ,  
1410 Yoshikawa G, Dimier C, Kandels-Lewis S, Picheral M, Searson S, Jaillon O,  
1411 Aury J-M, Karsenti E, Sullivan MB, Sunagawa S, Bork P, Not F, Hingamp P,  
1412 Raes J, Guidi L, Ogata H, Vargas C de, Iudicone D, Bowler C, Wincker P.  
1413 2018. A global ocean atlas of eukaryotic genes. *Nat Commun* **9**:373.  
1414 doi:10.1038/s41467-017-02342-1

1415 Eddy SR. 2011. Accelerated Profile HMM Searches. *PLoS Comput Biol*  
1416 **7**:e1002195. doi:10.1371/journal.pcbi.1002195

1417 Eddy SR. 1998. Profile hidden Markov models. *Bioinformatics* **14**:755–763.  
1418 doi:10.1093/bioinformatics/14.9.755

1419 El-Gebali S, Mistry J, Bateman A, Eddy SR, Luciani A, Potter SC, Qureshi M,  
1420 Richardson LJ, Salazar GA, Smart A, Sonnhammer ELL, Hirsh L, Paladin L,  
1421 Piovesan D, Tosatto SCE, Finn RD. 2019. The Pfam protein families  
1422 database in 2019. *Nucleic Acids Res* **47**:D427–D432.  
1423 doi:10.1093/nar/gky995

1424 Emms DM, Kelly S. 2015. OrthoFinder: solving fundamental biases in whole  
1425 genome comparisons dramatically improves orthogroup inference  
1426 accuracy. *Genome Biol* **16**:157. doi:10.1186/s13059-015-0721-2

1427 Filée J. 2015. Genomic comparison of closely related Giant Viruses supports an  
1428 accordion-like model of evolution. *Front Microbiol* **6**.  
1429 doi:10.3389/fmicb.2015.00593

1430 Gordon D, Green P. 2013. Consed: a graphical editor for next-generation  
1431 sequencing. *Bioinformatics* **29**:2936–2937.  
1432 doi:10.1093/bioinformatics/btt515

1433 Jarvis B, Wilrich C, Wilrich P-T. 2010. Reconsideration of the derivation of Most  
1434 Probable Numbers, their standard deviations, confidence bounds and  
1435 rarity values. *J Appl Microbiol* **109**:1660–1667. doi:10.1111/j.1365-  
1436 2672.2010.04792.x

1437 Johannessen TV, Bratbak G, Larsen A, Ogata H, Egge ES, Edvardsen B, Eikrem W,  
1438 Sandaa R-A. 2015. Characterisation of three novel giant viruses reveals

- 1439 huge diversity among viruses infecting Prymnesiales (Haptophyta).  
1440 *Virology* **476**:180–188. doi:10.1016/j.virol.2014.12.014
- 1441 Kanehisa M, Sato Y, Kawashima M, Furumichi M, Tanabe M. 2016. KEGG as a  
1442 reference resource for gene and protein annotation. *Nucleic Acids Res*  
1443 **44**:D457–D462. doi:10.1093/nar/gkv1070
- 1444 Katoh K, Standley DM. 2013. MAFFT multiple sequence alignment software  
1445 version 7: improvements in performance and usability. *Mol Biol Evol*  
1446 **30**:772–780. doi:10.1093/molbev/mst010
- 1447 Keeling PJ, Burki F, Wilcox HM, Allam B, Allen EE, Amaral-Zettler LA, Armbrust  
1448 EV, Archibald JM, Bharti AK, Bell CJ, Beszteri B, Bidle KD, Cameron CT,  
1449 Campbell L, Caron DA, Cattolico RA, Collier JL, Coyne K, Davy SK,  
1450 Deschamps P, Dyhrman ST, Edvardsen B, Gates RD, Gobler CJ, Greenwood  
1451 SJ, Guida SM, Jacobi JL, Jakobsen KS, James ER, Jenkins B, John U, Johnson  
1452 MD, Juhl AR, Kamp A, Katz LA, Kiene R, Kudryavtsev A, Leander BS, Lin S,  
1453 Lovejoy C, Lynn D, Marchetti A, McManus G, Nedelcu AM, Menden-Deuer  
1454 S, Miceli C, Mock T, Montresor M, Moran MA, Murray S, Nadathur G, Nagai  
1455 S, Ngam PB, Palenik B, Pawlowski J, Petroni G, Piganeau G, Posewitz MC,  
1456 Rengefors K, Romano G, Rumpho ME, Ryneerson T, Schilling KB,  
1457 Schroeder DC, Simpson AGB, Slamovits CH, Smith DR, Smith GJ, Smith SR,  
1458 Sosik HM, Stief P, Theriot E, Twary SN, Umale PE, Vaultot D, Wawrik B,  
1459 Wheeler GL, Wilson WH, Xu Y, Zingone A, Worden AZ. 2014. The Marine  
1460 Microbial Eukaryote Transcriptome Sequencing Project (MMETSP):  
1461 Illuminating the Functional Diversity of Eukaryotic Life in the Oceans  
1462 through Transcriptome Sequencing. *PLOS Biol* **12**:e1001889.  
1463 doi:10.1371/journal.pbio.1001889
- 1464 Keto-Timonen R, Hietala N, Palonen E, Hakakorpi A, Lindström M, Korkeala H.  
1465 2016. Cold Shock Proteins: A Minireview with Special Emphasis on Csp-  
1466 family of Enteropathogenic *Yersinia*. *Front Microbiol* **7**.  
1467 doi:10.3389/fmicb.2016.01151
- 1468 Kremer JR, Mastrorarde DN, McIntosh JR. 1996. Computer visualization of three-  
1469 dimensional image data using IMOD. *J Struct Biol* **116**:71–76.  
1470 doi:10.1006/jsbi.1996.0013
- 1471 Lartillot N, Lepage T, Blanquart S. 2009. PhyloBayes 3: a Bayesian software  
1472 package for phylogenetic reconstruction and molecular dating.  
1473 *Bioinformatics* **25**:2286–2288. doi:10.1093/bioinformatics/btp368
- 1474 Lartillot N, Philippe H. 2004. A Bayesian Mixture Model for Across-Site  
1475 Heterogeneities in the Amino-Acid Replacement Process. *Mol Biol Evol*  
1476 **21**:1095–1109. doi:10.1093/molbev/msh112
- 1477 Lartillot N, Rodrigue N, Stubbs D, Richer J. 2013. PhyloBayes MPI: phylogenetic  
1478 reconstruction with infinite mixtures of profiles in a parallel environment.  
1479 *Syst Biol* **62**:611–615. doi:10.1093/sysbio/syt022
- 1480 Lawrence JE, Steward GF. 2010. Purification of viruses by centrifugation In:  
1481 Wilhelm S, Weinbauer M, Suttle C, editors. Manual of Aquatic Viral  
1482 Ecology. American Society of Limnology and Oceanography. pp. 166–181.  
1483 doi:10.4319/mave.2010.978-0-9845591-0-7.166
- 1484 Letunic I, Bork P. 2016. Interactive tree of life (iTOL) v3: an online tool for the  
1485 display and annotation of phylogenetic and other trees. *Nucleic Acids Res*  
1486 **44**:W242–W245. doi:10.1093/nar/gkw290

- 1487 Loman NJ, Quick J, Simpson JT. 2015. A complete bacterial genome assembled de  
1488 novo using only nanopore sequencing data. *Nat Methods* **12**:733–735.  
1489 doi:10.1038/nmeth.3444
- 1490 Lowe TM, Chan PP. 2016. tRNAscan-SE On-line: integrating search and context  
1491 for analysis of transfer RNA genes. *Nucleic Acids Res* **44**:W54-57.  
1492 doi:10.1093/nar/gkw413
- 1493 Marchler-Bauer A, Derbyshire MK, Gonzales NR, Lu S, Chitsaz F, Geer LY, Geer RC,  
1494 He J, Gwadz M, Hurwitz DI, Lanczycki CJ, Lu F, Marchler GH, Song JS,  
1495 Thanki N, Wang Z, Yamashita RA, Zhang D, Zheng C, Bryant SH. 2015.  
1496 CDD: NCBI's conserved domain database. *Nucleic Acids Res* **43**:D222–  
1497 D226. doi:10.1093/nar/gku1221
- 1498 Margulies M, Egholm M, Altman WE, Attiya S, Bader JS, Bemben LA, Berka J,  
1499 Braverman MS, Chen Y-J, Chen Z, Dewell SB, Du L, Fierro JM, Gomes XV,  
1500 Godwin BC, He W, Helgesen S, Ho CH, Irzyk GP, Jando SC, Alenquer MLI,  
1501 Jarvie TP, Jirage KB, Kim J-B, Knight JR, Lanza JR, Leamon JH, Lefkowitz  
1502 SM, Lei M, Li J, Lohman KL, Lu H, Makhijani VB, McDade KE, McKenna MP,  
1503 Myers EW, Nickerson E, Nobile JR, Plant R, Puc BP, Ronan MT, Roth GT,  
1504 Sarkis GJ, Simons JF, Simpson JW, Srinivasan M, Tartaro KR, Tomasz A,  
1505 Vogt KA, Volkmer GA, Wang SH, Wang Y, Weiner MP, Yu P, Begley RF,  
1506 Rothberg JM. 2005. Genome sequencing in microfabricated high-density  
1507 picolitre reactors. *Nature* **437**:376–380. doi:10.1038/nature03959
- 1508 Marie D, Brussaard CPD, Thyrhaug R, Bratbak G, Vaultot D. 1999. Enumeration of  
1509 Marine Viruses in Culture and Natural Samples by Flow Cytometry. *Appl*  
1510 *Environ Microbiol* **65**:45–52.
- 1511 Mihara T, Nishimura Y, Shimizu Y, Nishiyama H, Yoshikawa G, Uehara H,  
1512 Hingamp P, Goto S, Ogata H. 2016. Linking Virus Genomes with Host  
1513 Taxonomy. *Viruses* **8**:66. doi:10.3390/v8030066
- 1514 Price MN, Dehal PS, Arkin AP. 2009. FastTree: Computing Large Minimum  
1515 Evolution Trees with Profiles instead of a Distance Matrix. *Mol Biol Evol*  
1516 **26**:1641–1650. doi:10.1093/molbev/msp077
- 1517 Pruitt KD, Tatusova T, Maglott DR. 2007. NCBI reference sequences (RefSeq): a  
1518 curated non-redundant sequence database of genomes, transcripts and  
1519 proteins. *Nucleic Acids Res* **35**:D61–D65. doi:10.1093/nar/gkl842
- 1520 Redrejo-Rodríguez M, Salas ML. 2014. Repair of base damage and genome  
1521 maintenance in the nucleo-cytoplasmic large DNA viruses. *Virus Res*  
1522 **179**:12–25. doi:10.1016/j.virusres.2013.10.017
- 1523 Sandaa R-A, E. Storesund J, Olesin E, Lund Paulsen M, Larsen A, Bratbak G, Ray JL.  
1524 2018. Seasonality Drives Microbial Community Structure, Shaping both  
1525 Eukaryotic and Prokaryotic Host–Viral Relationships in an Arctic Marine  
1526 Ecosystem. *Viruses* **10**. doi:10.3390/v10120715
- 1527 Schulz F, Yutin N, Ivanova NN, Ortega DR, Lee TK, Vierheilig J, Daims H, Horn M,  
1528 Wagner M, Jensen GJ, Kyrpides NC, Koonin EV, Woyke T. 2017. Giant  
1529 viruses with an expanded complement of translation system components.  
1530 *Science* **356**:82–85. doi:10.1126/science.aal4657
- 1531 Stamatakis A. 2014. RAxML version 8: a tool for phylogenetic analysis and post-  
1532 analysis of large phylogenies. *Bioinforma Oxf Engl* **30**:1312–1313.  
1533 doi:10.1093/bioinformatics/btu033
- 1534 Sunagawa S, Coelho LP, Chaffron S, Kultima JR, Labadie K, Salazar G, Djahanschiri  
1535 B, Zeller G, Mende DR, Alberti A, Cornejo-Castillo FM, Costea PI, Cruaud C,

- 1536 d'Ovidio F, Engelen S, Ferrera I, Gasol JM, Guidi L, Hildebrand F, Kokoszka  
1537 F, Lepoivre C, Lima-Mendez G, Poulain J, Poulos BT, Royo-Llonch M,  
1538 Sarmiento H, Vieira-Silva S, Dimier C, Picheral M, Searson S, Kandels-Lewis  
1539 S, Tara Oceans coordinators, Bowler C, de Vargas C, Gorsky G, Grimsley N,  
1540 Hingamp P, Iudicone D, Jaillon O, Not F, Ogata H, Pesant S, Speich S,  
1541 Stemmann L, Sullivan MB, Weissenbach J, Wincker P, Karsenti E, Raes J,  
1542 Acinas SG, Bork P. 2015. Ocean plankton. Structure and function of the  
1543 global ocean microbiome. *Science* **348**:1261359.  
1544 doi:10.1126/science.1261359
- 1545 Suzek BE, Wang Y, Huang H, McGarvey PB, Wu CH. 2015. UniRef clusters: a  
1546 comprehensive and scalable alternative for improving sequence similarity  
1547 searches. *Bioinformatics* **31**:926–932.  
1548 doi:10.1093/bioinformatics/btu739
- 1549 Tatusov RL, Galperin MY, Natale DA, Koonin EV. 2000. The COG database: a tool  
1550 for genome-scale analysis of protein functions and evolution. *Nucleic  
1551 Acids Res* **28**:33–36.
- 1552 Villar E, Vannier T, Vernet C, Lescot M, Cuenca M, Alexandre A, Bachelerie P,  
1553 Rosnet T, Pelletier E, Sunagawa S, Hingamp P. 2018. The Ocean Gene  
1554 Atlas: exploring the biogeography of plankton genes online. *Nucleic Acids  
1555 Res* **46**:W289–W295. doi:10.1093/nar/gky376
- 1556 Walker BJ, Abeel T, Shea T, Priest M, Abouelliel A, Sakthikumar S, Cuomo CA,  
1557 Zeng Q, Wortman J, Young SK, Earl AM. 2014. Pilon: An Integrated Tool for  
1558 Comprehensive Microbial Variant Detection and Genome Assembly  
1559 Improvement. *PLOS ONE* **9**:e112963. doi:10.1371/journal.pone.0112963
- 1560 Yutin N, Wolf YI, Koonin EV. 2014. Origin of giant viruses from smaller DNA  
1561 viruses not from a fourth domain of cellular life. *Virology* **466–467**:38–52.  
1562 doi:10.1016/j.virol.2014.06.032
- 1563 Yutin N, Wolf YI, Raoult D, Koonin EV. 2009. Eukaryotic large nucleo-cytoplasmic  
1564 DNA viruses: Clusters of orthologous genes and reconstruction of viral  
1565 genome evolution. *Virology* **6**:223. doi:10.1186/1743-422X-6-223
- 1566 Zhang H, Yohe T, Huang L, Entwistle S, Wu P, Yang Z, Busk PK, Xu Y, Yin Y. 2018.  
1567 dbCAN2: a meta server for automated carbohydrate-active enzyme  
1568 annotation. *Nucleic Acids Res* **46**:W95–W101. doi:10.1093/nar/gky418  
1569  
1570
